# Supplementary material for: Chronic Intake of Japanese Sake Mediates Radiation-Induced Metabolic Alterations in Mouse Liver
Source: PubMed Central journal article supplement (PMC4713437; doi:10.1371/journal.pone.0146730), 2016-01-11

S1 Fig. Effects of sake administration on the body weight of mice (n=4).

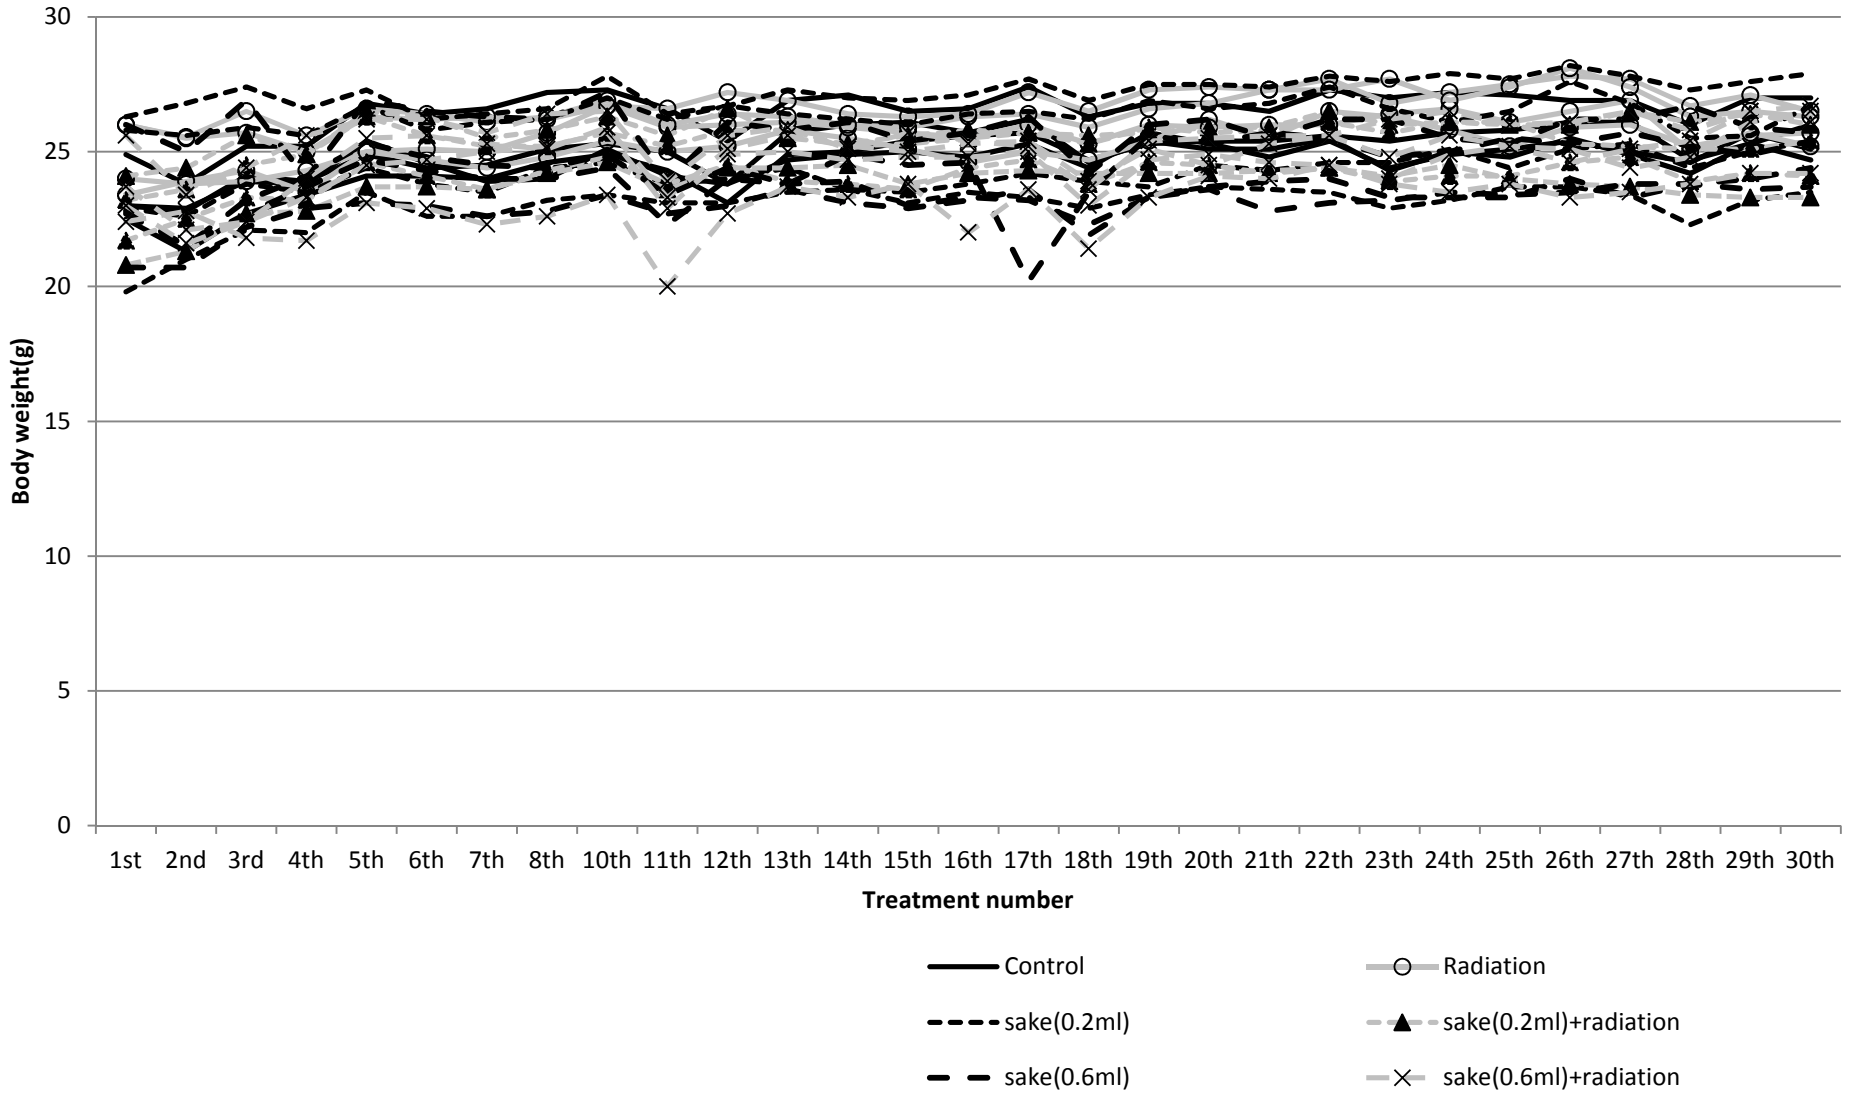

Supplement: pone.0146730.s001.pdf [file pone.0146730.s001.pdf]
