# Supplementary material for: Chronic Intake of Japanese Sake Mediates Radiation-Induced Metabolic Alterations in Mouse Liver
Source: PubMed Central journal article supplement (PMC4713437; doi:10.1371/journal.pone.0146730), 2016-01-11
Supplement: pone.0146730.s004.pdf [file pone.0146730.s004.pdf]

S1 Table. Mean body weight of the treatment groups throughout the administration period.

| Administration Day | Weight of control group | Weight of radiation group | Weight in sake group | Weight in sake+radiation group | Statistic analysis, no intake (control+radiation) groups vs sake intake groups (N=8,before irradiation) | Statistic analysis (N=4, after irradiation) |
|--------------------|-------------------------|---------------------------|----------------------|--------------------------------|---------------------------------------------------------------------------------------------------------|---------------------------------------------|
| 1                  | 23.35±1.1               | 24.85±1.4                 | 23.05±2.2            | 23.68±1.4                      | NS                                                                                                      |                                             |
| 2                  | 22.70±1.0               | 24.69±0.97                | 22.18±1.9            | 22.48±0.79                     | NS                                                                                                      |                                             |
| 3                  | 23.98±1.0               | 25.10±1.2                 | 23.75±2.1            | 22.75±1.1                      | NS                                                                                                      |                                             |
| 4                  | 24.08±0.78              | 24.60±0.91                | 23.68±0.54           | 23.65±1.6                      | NS                                                                                                      |                                             |
| 5                  | 25.30±1.1               | 25.73±0.85                | 25.00±1.6            | 24.83±1.3                      | NS                                                                                                      |                                             |
| 6                  | 24.88±1.0               | 25.60±0.83                | 24.65±1.4            | 24.80±1.4                      | NS                                                                                                      |                                             |
| 7                  | 24.75±1.3               | 25.45±0.9                 | 24.35±1.5            | 24.58±1.5                      | NS                                                                                                      |                                             |
| 8                  | 25.23±1.4               | 25.75±0.69                | 24.35±1.4            | 24.83±1.6                      | NS                                                                                                      |                                             |
| 9                  | ND                      |                           | ND                   |                                |                                                                                                         |                                             |
| 10                 | 25.65±1.1               | 26.43±0.7                 | 24.98±1.6            | 25.38±1.4                      | NS                                                                                                      |                                             |
| 11                 | 25.00±1.1               | 25.88±0.66                | 23.08±0.71           | 22.53±1.7                      | P<0.01                                                                                                  |                                             |
| 12                 | 24.03±0.97              | 26.20±0.83                | 24.38±1.3            | 24.58±1.3                      | NS                                                                                                      |                                             |
| 13                 | 25.55±1.0               | 26.28±0.46                | 24.25±1.0            | 25.05±0.97                     | P<0.05                                                                                                  |                                             |
| 14                 | 25.75±1.0               | 25.95±0.37                | 24.50±1.3            | 24.58±0.88                     | P<0.05                                                                                                  |                                             |
| 15                 | 25.75±0.68              | 25.75±0.5                 | 23.95±1.2            | 24.83±0.78                     | P<0.01                                                                                                  |                                             |
| 16                 | 25.68±0.74              | 25.70±0.84                | 24.20±1.2            | 24.38±1.6                      | P<0.05                                                                                                  |                                             |
| 17                 | 26.15±0.91              | 26.15±0.91                | 23.33±2.5            | 24.80±0.82                     | P<0.05                                                                                                  |                                             |
| 18                 | 25.00±0.88              | 25.60±0.77                | 22.98±1.1            | 22.98±1.1                      | P<0.01                                                                                                  |                                             |
| 19                 | 25.80±0.69              | 26.33±0.81                | 24.55±1.5            | 24.63±0.93                     | P<0.01                                                                                                  |                                             |
| 20                 | 25.65±0.78              | 26.58±0.67                | 24.70±1.3            | 24.75±0.6                      | P<0.01                                                                                                  |                                             |
| 21                 | 25.45±0.74              | 26.53±0.92                | 24.48±1.4            | 24.88±0.72                     | P<0.05                                                                                                  |                                             |
| 22                 | 25.95±0.9               | 26.88±0.77                | 24.70±1.4            | 25.05±0.64                     | P<0.01                                                                                                  |                                             |
| 23                 | 25.28±1.3               | 26.80±0.64                | 24.38±1.4            | 24.70±1.1                      | P<0.05                                                                                                  |                                             |
| 24                 | 25.70±1.1               | 26.63±0.6                 | 24.33±1.1            | 25.13±1.3                      | P<0.05                                                                                                  |                                             |
| 25                 | 25.70±1.0               | 26.55±1.1                 | 24.38±1.2            | 25.05±0.91                     | P<0.01                                                                                                  |                                             |
| 26                 | 25.98±0.69              | 27.08±1.0                 | 24.75±1.2            | 24.78±1.2                      | P<0.01                                                                                                  |                                             |
| 27                 | 25.73±0.95              | 27.00±0.74                | 24.75±1.4            | 24.88±1.3                      | P<0.05                                                                                                  |                                             |
| 28                 | 24.88±0.78              | 25.80±0.83                | 24.88±1.4            | 24.95±0.87                     |                                                                                                         | NS to control                               |
| 29                 | 25.83±0.81              | 26.23±0.71                | 24.60±1.0            | 25.83±1.1                      |                                                                                                         | NS to control                               |
| 30                 | 25.70±1.0               | 25.93±0.59                | 24.8±0.92            | 25.88±1.1                      |                                                                                                         | NS to control                               |

Data are presented as the mean (g) ± SD

Body weight on administration day 9 was not determined (ND), and the sake administration was therefore performed based on the 8th weight.

Statistic analysis was performed by the two-tailed unpaired t-test.

NS, not significant.
