# Supplementary material for: Chronic Intake of Japanese Sake Mediates Radiation-Induced Metabolic Alterations in Mouse Liver
Source: PubMed Central journal article supplement (PMC4713437; doi:10.1371/journal.pone.0146730), 2016-01-11
Supplement: pone.0146730.s005.pdf [file pone.0146730.s005.pdf]

S2 Table. Mean body weight of the treatment groups throughout the administration period.

| Administration day | Weight in control group | Weight of radiation group | Weight of ethanol group | Weight of ethanol+radiation group | Statistic analysis, no intake (control+radiation groups) vs ethanol intake groups (N=10, before irradiation) | Statistic analysis (N=5, after irradiation) |
|--------------------|-------------------------|---------------------------|-------------------------|-----------------------------------|--------------------------------------------------------------------------------------------------------------|---------------------------------------------|
| 1                  | 22.26±1.2               | 23.24±1.4                 | 22.34±1.4               | 21.02±1.1                         | NS                                                                                                           |                                             |
| 2                  | 22.84±0.84              | 23.64±1.1                 | 22.96±0.97              | 22.60±1.0                         | NS                                                                                                           |                                             |
| 3                  | 23.32±0.87              | 23.82±1.0                 | 23.36±0.7               | 23.50±0.97                        | NS                                                                                                           |                                             |
| 4                  | 23.90±0.79              | 24.40±0.86                | 23.84±0.57              | 24.00±0.79                        | NS                                                                                                           |                                             |
| 5                  | 24.14±0.92              | 24.72±0.78                | 24.12±0.92              | 23.80±0.91                        | NS                                                                                                           |                                             |
| 6                  | 24.64±0.78              | 25.18±0.59                | 24.22±0.83              | 24.64±0.92                        | NS                                                                                                           |                                             |
| 7                  | 24.34±0.84              | 24.72±0.53                | 24.16±0.52              | 24.22±1.0                         | NS                                                                                                           |                                             |
| 8                  | 24.52±0.76              | 25.04±0.63                | 23.84±1.2               | 24.44±0.79                        | NS                                                                                                           |                                             |
| 9                  | 24.64±0.91              | 25.28±0.61                | 23.72±1.8               | 24.10±0.89                        | P<0.05                                                                                                       |                                             |
| 10                 | 24.36±1.1               | 24.94±0.47                | 23.56±1.4               | 23.66±0.42                        | P<0.05                                                                                                       |                                             |
| 11                 | 24.76±1.4               | 25.78±0.81                | 24.10±1.5               | 24.60±0.48                        | P<0.05                                                                                                       |                                             |
| 12                 | 24.76±1.6               | 25.84±0.51                | 24.20±1.3               | 24.78±0.68                        | NS                                                                                                           |                                             |
| 13                 | 24.68±1.6               | 25.78±0.63                | 24.16±1.2               | 24.42±1.2                         | P<0.05                                                                                                       |                                             |
| 14                 | 24.36±1.5               | 25.22±0.70                | 23.10±0.58              | 23.56±0.73                        | P<0.01                                                                                                       |                                             |
| 15                 | 24.62±1.4               | 25.58±0.74                | 21.46±1.1               | 21.22±1.7                         | P<0.01                                                                                                       |                                             |
| 16                 | 24.66±1.4               | 25.76±0.67                | 23.80±1.12              | 23.44±1.5                         | P<0.01                                                                                                       |                                             |
| 17                 | 24.48±1.1               | 25.54±0.65                | 22.12±2.3               | 22.22±0.34                        | P<0.01                                                                                                       |                                             |
| 18                 | 24.86±1.0               | 26.02±0.62                | 24.14±0.89              | 24.42±0.73                        | P<0.01                                                                                                       |                                             |
| 19                 | 24.90±1.2               | 25.84±0.76                | 24.42±0.79              | 24.48±1.1                         | P<0.05                                                                                                       |                                             |
| 20                 | 25.04±1.4               | 25.78±0.55                | 24.74±0.94              | 24.44±0.99                        | P<0.05                                                                                                       |                                             |
| 21                 | 24.82±1.3               | 25.82±0.74                | 24.40±0.85              | 24.24±1.1                         | P<0.05                                                                                                       |                                             |
| 22                 | 24.86±1.3               | 25.76±0.86                | 24.32±0.68              | 24.12±1.2                         | P<0.05                                                                                                       |                                             |
| 23                 | 25.00±1.1               | 25.64±0.76                | 23.92±0.8               | 24.38±1.4                         | P<0.05                                                                                                       |                                             |
| 24                 | 24.86±1.2               | 25.64±0.92                | 24.18±0.85              | 24.20±0.86                        | P<0.05                                                                                                       |                                             |
| 25                 | 25.00±1.3               | 25.76±0.92                | 24.00±1.1               | 24.08±0.64                        | P<0.01                                                                                                       |                                             |
| 26                 | 24.90±1.1               | 25.64±0.75                | 24.02±0.88              | 23.80±1.1                         | P<0.01                                                                                                       |                                             |
| 27                 | 25.24±0.96              | 25.50±0.73                | 24.48±0.86              | 24.46±0.94                        | P<0.05                                                                                                       |                                             |
| 28                 | 24.92±1.1               | 25.06±1.0                 | 23.98±0.84              | 24.6±0.99                         |                                                                                                              | NS (each group to Control)                  |
| 29                 | 25.02±1.1               | 25.36±0.85                | 24.32±0.85              | 24.28±1.2                         |                                                                                                              | NS (each group to Control)                  |
| 30                 | 25.56±1.2               | 25.42±0.82                | 24.54±0.78              | 25.00±0.82                        |                                                                                                              | NS (each group to Control)                  |

Data are presented as mean (g) ± SD

Statistic analysis was performed by the two-tailed unpaired t-test.

NS, not significant.
