# Supplementary material for: Chronic Intake of Japanese Sake Mediates Radiation-Induced Metabolic Alterations in Mouse Liver
Source: PubMed Central journal article supplement (PMC4713437; doi:10.1371/journal.pone.0146730), 2016-01-11
Supplement: pone.0146730.s006.pdf [file pone.0146730.s006.pdf]

**S3 Table. Metabolome data for the livers of irradiated mice administered sake.** Values represent the relative areas of each metabolite peak to the peak area of an internal standard.

| Compound name                      | Relative Area |         |         |         |         |         |         |         |         |         |         |         | Comparative Analysis |         |         |         |                 |         |         |         |                    |                       |                    |                       |                    |                       |                    |                       |                    |                       |       |    |
|------------------------------------|---------------|---------|---------|---------|---------|---------|---------|---------|---------|---------|---------|---------|----------------------|---------|---------|---------|-----------------|---------|---------|---------|--------------------|-----------------------|--------------------|-----------------------|--------------------|-----------------------|--------------------|-----------------------|--------------------|-----------------------|-------|----|
|                                    | control       |         |         |         | rad     |         |         |         | sake    |         |         |         | sake+rad             |         |         |         | sake vs control |         |         |         | sake+rad vs rad    |                       |                    |                       | sake+rad vs sake   |                       |                    |                       |                    |                       |       |    |
|                                    | 1             | 2       | 3       | 4       | 5       | 6       | 7       | 8       | 9       | 10      | 11      | 12      | Mean                 | S.D.    | Mean    | S.D.    | Mean            | S.D.    | Mean    | S.D.    | Ratio <sup>1</sup> | p-value <sup>II</sup> | Ratio <sup>1</sup> | p-value <sup>II</sup> | Ratio <sup>1</sup> | p-value <sup>II</sup> | Ratio <sup>1</sup> | p-value <sup>II</sup> | Ratio <sup>1</sup> | p-value <sup>II</sup> |       |    |
| Oxotanic acid                      | N.D.          | N.D.    | N.D.    | N.D.    | 1.3E-04 | N.D.    | 3.8E-04 | 5.4E-04 | 4.2E-04 | N.D.    | N.D.    | N.D.    | N.A.                 | 1.3E-04 | N.A.    | 4.4E-04 | 8.7E-05         | N.D.    | N.A.    | N.A.    | <1                 | N.A.                  | <1                 | N.A.                  | N.A.               | N.A.                  | <1                 | N.A.                  | <1                 | N.A.                  |       |    |
| XA0013                             | N.D.          | N.D.    | N.D.    | 1.7E-04 | N.D.    | N.D.    | N.D.    | 4.6E-04 | N.D.    | N.D.    | N.D.    | N.D.    | N.A.                 | 1.7E-04 | N.A.    | 4.6E-04 | N.A.            | N.A.    | N.A.    | N.A.    | <1                 | N.A.                  | <1                 | N.A.                  | N.A.               | N.A.                  | <1                 | N.A.                  | <1                 | N.A.                  |       |    |
| Fructose 1,6-diphosphate           | 2.9E-04       | 3.6E-04 | 3.1E-04 | 3.2E-03 | 4.9E-04 | 3.8E-04 | 3.1E-04 | 2.8E-04 | 2.8E-04 | 2.7E-04 | 3.7E-04 | 3.8E-04 | 3.2E-04              | 3.8E-05 | 1.4E-03 | 1.6E-03 | 2.9E-04         | 1.8E-05 | 3.4E-04 | 6.2E-05 | 4.2                | 0.378                 | 1.1                | 0.713                 | 0.2                | 0.385                 | 1.2                | 0.325                 |                    |                       |       |    |
| UDP-glucose                        | 2.5E-04       | 2.4E-04 | 4.7E-04 | 2.0E-03 | 6.2E-04 | 3.9E-04 | N.D.    | 3.0E-04 | 1.6E-04 | 8.5E-04 | 6.0E-04 | 3.2E-04 | 1.3E-05              | 1.0E-05 | 9.9E-05 | 8.5E-05 | 2.7E-04         | 4.2E-05 | 5.4E-04 | 3.5E-04 | 3.1                | 0.308                 | 1.7                | 0.403                 | 0.5                | 0.464                 | 2.0                | 0.315                 |                    |                       |       |    |
| UDP-galactose                      | 7.8E-03       | 1.1E-02 | 1.4E-02 | 2.4E-02 | 2.9E-02 | 3.6E-02 | 9.5E-03 | 8.9E-03 | 1.2E-02 | 1.9E-02 | 1.8E-02 | 1.1E-02 | 3.2E-03              | 3.0E-02 | 6.1E-03 | 1.0E-02 | 1.6E-03         | 1.8E-02 | 1.5E-03 | 2.7     | 0.018              | 0.9                   | 0.743              | 1.6                   | 0.047              | 0.6                   | 0.072              | 1.8                   | 0.004              | **                    |       |    |
| Tauricholic acid                   | 4.6E-02       | 4.1E-02 | 3.3E-02 | 1.2E-01 | 4.9E-02 | 5.0E-02 | 7.5E-02 | 4.7E-02 | 1.6E-02 | 3.0E-02 | 4.6E-02 | 6.8E-02 | 3.3E-02              | 4.0E-02 | 6.6E-02 | 4.9E-02 | 2.6E-02         | 3.2E-02 | 4.1E-02 | 2.1     | 0.158              | 0.8                   | 0.428              | 0.4                   | 0.106              | 0.6                   | 0.382              |                       |                    |                       |       |    |
| 3'-ADP                             | 2.3E-04       | 2.5E-04 | 2.6E-04 | 3.9E-04 | 3.5E-04 | 6.7E-04 | 2.3E-04 | 2.3E-04 | 2.6E-04 | 1.9E-04 | 1.8E-04 | 1.5E-04 | 2.5E-04              | 1.6E-05 | 4.7E-04 | 1.7E-04 | 2.4E-04         | 1.8E-05 | 1.7E-04 | 2.2E-05 | 1.9                | 0.154                 | 1.0                | 0.629                 | 0.7                | 0.011                 | 0.4                | 0.093                 | 0.7                | 0.015                 | *     |    |
| Dihydroxyacetone phosphate         | 2.1E-03       | 2.4E-03 | 3.8E-03 | 9.4E-03 | 4.2E-03 | 3.5E-03 | 1.7E-03 | 2.6E-03 | 1.2E-03 | 1.7E-03 | 2.8E-03 | 2.8E-03 | 4.7E-03              | 2.8E-03 | 6.8E-03 | 4.2E-03 | 4.6E-03         | 2.9E-03 | 2.1E-03 | 1.9     | 0.380              | 1.0                   | 0.930              | 3.0                   | 0.6                | 0.407                 | 1.3                | 0.588                 |                    |                       |       |    |
| S                                  | 2.0E-04       | 1.4E-04 | 1.7E-04 | 2.3E-04 | 1.8E-04 | 4.8E-04 | 2.2E-04 | 2.6E-04 | 7.2E-04 | 1.6E-04 | 4.1E-04 | 2.2E-04 | 1.7E-04              | 2.8E-05 | 3.0E-04 | 1.6E-04 | 4.0E-04         | 2.7E-04 | 2.6E-04 | 1.3E-04 | 1.8                | 0.298                 | 2.4                | 0.277                 | 1.6                | 0.336                 | 0.9                | 0.793                 | 0.7                | 0.493                 |       |    |
| Lactoylglutathione                 | 4.9E-02       | 5.6E-02 | 8.2E-02 | 7.5E-02 | 1.1E-01 | 1.3E-01 | 5.2E-02 | 6.8E-02 | 7.9E-02 | 9.5E-02 | 1.3E-02 | 1.1E-01 | 6.3E-02              | 1.8E-02 | 1.1E-01 | 3.0E-02 | 6.6E-02         | 1.3E-02 | 9.8E-02 | 6.4E-03 | 1.7                | 0.111                 | 1.0                | 0.827                 | 1.6                | 0.059                 | 0.9                | 0.698                 | 1.5                | 0.035                 | *     |    |
| Tetrahydrobiopterin                | N.D.          | N.D.    | 1.2E-04 | N.D.    | 1.9E-04 | N.D.    | N.D.    | 1.9E-04 | N.D.    | 1.1E-04 | 1.4E-04 | 1.2E-04 | 1.2E-04              | N.A.    | 1.9E-04 | N.A.    | 1.1E-04         | N.A.    | 1.3E-04 | 9.8E-06 | 1.7                | N.A.                  | 1.0                | N.A.                  | 1.1                | N.A.                  | 0.7                | N.A.                  | 1.2                | N.A.                  |       |    |
| Triethanolamine                    | 6.0E-05       | 7.4E-05 | 6.4E-05 | 1.4E-04 | 1.1E-04 | 6.7E-05 | 8.5E-04 | 6.4E-05 | 7.4E-05 | 6.1E-05 | 5.6E-05 | 9.0E-05 | 6.6E-05              | 7.5E-06 | 1.1E-04 | 3.7E-05 | 3.3E-04         | 4.5E-06 | 6.9E-05 | 1.8E-05 | 1.6                | 0.191                 | 1.0                | 0.813                 | 0.6                | 0.211                 | 0.2                | 0.423                 |                    |                       |       |    |
| γ-Glu-2-aminobutyric acid          | 1.5E-04       | 1.5E-04 | 2.3E-04 | 2.3E-04 | 3.2E-04 | 3.1E-04 | 1.8E-04 | 1.6E-04 | 1.5E-04 | 1.7E-04 | 1.9E-04 | 2.0E-04 | 1.8E-04              | 1.4E-05 | 2.9E-04 | 5.0E-05 | 1.6E-04         | 1.2E-05 | 1.9E-04 | 1.4E-05 | 1.6                | 0.053                 | 0.9                | 0.665                 | 1.1                | 0.723                 | 0.7                | 0.071                 | 1.2                | 0.074                 |       |    |
| Cys                                | 1.6E-04       | 1.3E-04 | 1.4E-04 | 2.0E-04 | 2.2E-04 | 2.6E-04 | 1.5E-04 | 2.4E-04 | 2.3E-04 | 4.2E-04 | 4.5E-04 | 4.0E-04 | 1.4E-04              | 1.8E-05 | 2.3E-04 | 2.1E-04 | 4.7E-04         | 4.2E-04 | 2.9E-05 | 1.6     | 0.014              | 1.4                   | 0.129              | 3.0                   | 4.1E-04            | ***                   | 1.9                | 0.001                 | **                 |                       |       |    |
| Inosine                            | 2.0E-02       | 2.0E-02 | 2.5E-02 | 4.2E-02 | 3.1E-02 | 2.9E-02 | 2.3E-02 | 2.6E-02 | 3.2E-02 | 4.1E-02 | 3.2E-02 | 2.1E-02 | 2.7E-03              | 3.4E-02 | 6.8E-03 | 2.7E-02 | 4.5E-03         | 3.6E-02 | 4.6E-03 | 1.6     | 0.070              | 1.7                   | 0.015              | 1.1                   | 0.699              | 1.3                   | 0.078              |                       |                    |                       |       |    |
| Phosphoenolpyruvic acid            | 4.6E-04       | 5.4E-04 | 6.8E-04 | 8.5E-04 | 8.7E-04 | 9.6E-04 | 3.8E-04 | 4.5E-04 | 4.0E-04 | 5.7E-04 | 5.3E-04 | 7.5E-04 | 6.6E-04              | 1.1E-04 | 8.7E-04 | 2.7E-05 | 4.1E-04         | 3.7E-05 | 6.1E-04 | 1.2E-04 | 1.6                | 0.033                 | 0.7                | 0.131                 | 1.1                | 0.608                 | 0.7                | 0.063                 | 1.5                | 0.094                 |       |    |
| Creatine                           | 3.2E-02       | 3.0E-02 | 2.8E-02 | 4.4E-02 | 4.9E-02 | 4.6E-02 | 2.5E-02 | 2.5E-02 | 2.6E-02 | 5.0E-02 | 3.2E-02 | 3.0E-02 | 1.9E-03              | 4.6E-02 | 2.7E-03 | 2.5E-02 | 4.4E-04         | 4.0E-02 | 8.3E-03 | 1.5     | 0.020              | **                    | 0.8                | 0.044                 | 1.3                | 0.156                 | 0.9                | 0.345                 | 1.6                | 0.087                 |       |    |
| 3-Phosphoglyceric acid             | 1.0E-03       | 1.2E-03 | 1.4E-03 | 1.8E-03 | 1.7E-03 | 1.2E-03 | 6.9E-04 | 9.2E-04 | 8.7E-04 | 1.2E-03 | 1.6E-03 | 1.2E-03 | 2.0E-04              | 1.9E-03 | 2.2E-04 | 8.3E-04 | 1.3E-03         | 2.1E-04 | 1.5     | 0.002   | **                 | 0.7                   | 0.053              | 1.1                   | 0.550              | 0.7                   | 0.041              | 1.6                   | 0.036              | **                    |       |    |
| XA0035                             | 4.3E-04       | 4.3E-04 | 4.4E-04 | 5.7E-04 | 6.3E-04 | 7.5E-04 | 3.1E-04 | 4.1E-04 | 4.5E-04 | 5.4E-04 | 5.1E-04 | 4.2E-04 | 3.4E-04              | 7.0E-06 | 6.5E-04 | 9.1E-05 | 3.8E-04         | 6.0E-05 | 4.9E-04 | 6.0E-05 | 1.5                | 0.055                 | 0.9                | 0.260                 | 1.1                | 0.244                 | 0.8                | 0.078                 | 1.3                | 0.088                 |       |    |
| Homovanillic acid                  | 1.6E-04       | 2.4E-04 | 2.0E-04 | 1.5E-04 | 4.2E-04 | 3.1E-04 | 2.4E-04 | 2.0E-04 | 2.2E-04 | 3.2E-04 | 1.9E-04 | 2.0E-04 | 4.0E-05              | 2.9E-04 | 4.1E-05 | 2.1E-04 | 2.2E-05         | 2.7E-04 | 6.7E-05 | 1.5     | 0.392              | 1.1                   | 0.833              | 1.4                   | 0.217              | 0.9                   | 0.806              | 1.3                   | 0.283              |                       |       |    |
| Ascorbic acid                      | 1.6E-02       | 2.0E-02 | 2.3E-02 | 2.0E-02 | 2.8E-02 | 3.6E-02 | 1.5E-02 | 1.7E-02 | 2.7E-02 | 3.8E-02 | 3.1E-02 | 2.8E-02 | 1.9E-02              | 3.7E-03 | 2.8E-02 | 7.5E-03 | 2.0E-02         | 6.9E-03 | 3.2E-02 | 3.8E-03 | 1.4                | 0.184                 | 1.0                | 0.936                 | 1.6                | 0.017                 | 1.1                | 0.510                 | 1.6                | 0.072                 |       |    |
| 3-Deoxyphospho-N-acetylglucosamine | 1.8E-04       | 1.2E-04 | 1.7E-04 | 2.0E-04 | 2.0E-04 | 2.8E-04 | 1.6E-04 | 2.0E-04 | 2.7E-04 | 4.8E-04 | 4.8E-04 | 1.6E-04 | 3.3E-05              | 2.2E-04 | 4.8E-05 | 2.1E-04 | 5.7E-05         | 4.4E-04 | 5.7E-05 | 1.4     | 0.124              | 1.3                   | 0.248              | 2.8                   | 0.004              | **                    | 2.0                | 0.008                 | **                 | 2.1                   | 0.007 | ** |
| Acetylglucosamine                  | 3.8E-04       | 4.4E-04 | 5.5E-04 | 5.4E-04 | 5.1E-04 | 8.7E-04 | 4.2E-04 | 4.2E-04 | 5.8E-04 | 3.9E-04 | 5.3E-04 | 4.6E-04 | 8.6E-05              | 6.4E-04 | 2.0E-04 | 4.1E-04 | 8.4E-05         | 4.3E-04 | 4.7E-05 | 1.4     | 0.255              | 0.9                   | 0.457              | 1.2                   | 0.278              | 0.8                   | 0.458              | 1.3                   | 0.044              | **                    |       |    |
| Diphosphoglyceric acid             | 5.8E-03       | 7.9E-03 | 4.9E-03 | 1.3E-02 | 6.7E-03 | 5.9E-03 | 6.2E-03 | 5.9E-03 | 4.2E-03 | 5.1E-03 | 5.8E-03 | 5.9E-03 | 6.1E-03              | 1.6E-03 | 8.5E-03 | 3.9E-03 | 5.4E-03         | 1.1E-03 | 5.5E-03 | 4.0E-04 | 1.4                | 0.405                 | 0.9                | 0.543                 | 0.9                | 0.574                 | 0.6                | 0.312                 | 1.0                | 0.861                 |       |    |
| 5-Choroline                        | 6.3E-04       | 4.4E-04 | 4.9E-04 | 9.8E-04 | 5.8E-04 | 6.0E-04 | 7.7E-04 | 5.7E-04 | 5.5E-04 | 8.7E-04 | 7.7E-04 | 7.5E-04 | 5.2E-04              | 9.8E-05 | 7.2E-04 | 2.3E-04 | 6.3E-04         | 1.2E-04 | 8.0E-04 | 6.5E-05 | 1.4                | 0.284                 | 1.2                | 0.280                 | 1.5                | 0.019                 | *                  | 1.1                   | 0.813              | 1.3                   | 0.116 |    |
| Ribulose 5-phosphate               | 6.0E-03       | 5.8E-03 | 6.2E-03 | 9.4E-03 | 6.8E-03 | 8.2E-03 | 5.9E-03 | 6.2E-03 | 6.2E-03 | 8.8E-03 | 7.7E-03 | 7.8E-03 | 6.0E-03              | 8.1E-03 | 1.3E-03 | 6.2E-03 | 3.1E-04         | 8.1E-03 | 6.8E-04 | 1.4     | 0.100              | 1.0                   | 0.337              | 1.3                   | 0.027              | **                    | 1.0                | 0.954                 | 1.3                | 0.027                 | *     |    |
| Fructose 6-phosphate               | 6.7E-03       | 4.9E-03 | 6.9E-03 | 1.2E-02 | 6.3E-03 | 6.7E-03 | 6.5E-03 | 7.2E-03 | 6.9E-03 | 6.0E-03 | 2.6E-03 | 6.0E-03 | 4.2E-03              | 6.2E-03 | 1.1E-03 | 8.4E-03 | 3.1E-03         | 6.8E-03 | 3.5E-04 | 1.7E-03 | 1.4                | 0.356                 | 1.1                | 0.410                 | 0.7                | 0.193                 | 0.5                | 0.140                 | 0.6                | 0.119                 |       |    |
| Adenosine                          | 2.8E-02       | 3.0E-02 | 2.9E-02 | 2.7E-02 | 4.2E-02 | 4.7E-02 | 2.7E-02 | 2.4E-02 | 3.5E-02 | 2.9E-02 | 2.9E-02 | 2.9E-02 | 2.9E-02              | 1.1E-02 | 2.2E-02 | 5.1E-03 | 2.9E-02         | 5.1E-03 | 1.3     | 0.260   | 0.8                | 0.148                 | 1.0                | 0.899                 | 0.8                | 0.277                 | 1.3                | 0.163                 |                    |                       |       |    |
| XC0126                             | 1.8E-04       | 1.4E-04 | 1.4E-04 | 1.7E-04 | 1.7E-04 | 2.6E-04 | 1.4E-04 | 1.5E-04 | 1.7E-04 | 2.3E-04 | 2.0E-04 | 1.7E-04 | 1.6E-04              | 2.3E-05 | 2.0E-04 | 5.0E-05 | 1.8E-05         | 2.0E-04 | 3.0E-05 | 1.3     | 0.283              | 1.3                   | 0.141              | 1.0                   | 0.839              | 1.0                   | 0.919              | 1.3                   | 0.108              |                       |       |    |
| Gln                                | 3.5E-01       | 2.3E-01 | 2.8E-01 | 3.5E-01 | 2.6E-01 | 2.8E-01 | 2.1E-01 | 2.4E-01 | 2.1E-01 | 2.1E-01 | 2.7E-01 | 2.8E-01 | 2.6E-01              | 2.3E-01 | 1.7E-02 | 3.0E-01 | 4.4E-02         | 2.2E-01 | 1.7E-02 | 0.9     | 0.302              | 1.1                   | 0.082              | 1.1                   | 0.092              | 1.1                   | 0.092              | 1.2                   | 0.092              |                       |       |    |
| Hexanoic acid                      | 2.4E-04       | N.D.    | 2.4E-04 | N.D.    | 3.0E-04 | N.D.    | 4.6E-04 | 9.1E-04 | 5.6E-04 | 3.0E-04 | 2.5E-04 | N.D.    | 2.4E-04              | 4.3E-06 | 3.0E-04 | N.A.    | 6.4E-04         | 2.4E-04 | 2.8E-04 | 3.1E-05 | 1.3                | N.A.                  | 2.7                | 0.099                 | 1.2                | 0.384                 | 0.9                | N.A.                  | 0.4                | 0.112                 |       |    |
| γ-Aminobutyric acid                | 3.4E-03       | 4.2E-03 | 4.2E-03 | 7.4E-03 | 4.9E-03 | 2.4E-03 | 5.5E-03 | 6.1E-03 | 9.0E-03 | 5.1E-03 | 6.9E-03 | 7.2E-03 | 6.3E-03              | 4.6E-04 | 5.9E-03 | 2.5E-03 | 3.9E-04         | 7.7E-03 | 3.6E-03 | 1.2     | 0.574              | 2.0                   | 0.017              | 1.6                   | 0.182              | 1.4                   | 0.061              |                       |                    |                       |       |    |
| N <sup>6</sup> -acetyllysine       | 6.1E-04       | 5.4E-04 | 6.5E-04 | 8.0E-04 | 6.7E-04 | 7.7E-04 | 5.8E-04 | 6.4E-04 | 4.9E-04 | 7.2E-04 | 5.6E-04 | 6.2E-04 | 6.0E-04              | 5.5E-05 | 7.5E-04 | 6.7E-05 | 5.7E-04         | 7.7E-05 | 6.4E-04 | 7.1E-05 | 1.2                | 0.043                 | 1.0                | 0.628                 | 1.1                | 0.450                 | 0.9                | 0.136                 | 1.1                | 0.286                 |       |    |
| CoA-divalent glutathione           | 5.5E-03       | 4.2E-03 | 6.2E-03 | 5.9E-03 | 6.1E-03 | 7.6E-03 | 5.1E-03 | 6.3E-03 | 7.1E-03 | 6.0E-03 | 6.3E-03 | 7.3E-03 | 6.9E-03              | 9.9E-04 | 6.6E-03 | 9.4E-04 | 6.6E-03         | 1.0E-03 | 7.7E-03 | 4.5E-04 | 1.2                | 0.183                 | 1.2                | 0.356                 | 1.5                | 0.035                 | 1.2                | 0.150                 | 1.3                | 0.092                 |       |    |
| Nitrate                            | 3.8E-01       | 3.4E-01 | 4.5E-01 | 4.5E-01 | 4.5E-01 | 4.1E-01 | 4.0E-01 | 4.0E-01 | 5.8E-01 | 3.9E-01 | 5.8E-01 | 5.8E-01 | 4.8E-01              | 3.4E-02 | 4.3E-01 | 5.9E-02 | 5.9E-01         | 4.1E-02 | 1.2     | 0.082   | 1.1                | 0.082                 | 1.1                | 0.082                 | 1.1                | 0.082                 | 1.1                | 0.082                 |                    |                       |       |    |
| Lactic acid                        | 4.0E-01       | 4.0E-01 | 4.8E-01 |         |         |         |         |         |         |         |         |         |                      |         |         |         |                 |         |         |         |                    |                       |                    |                       |                    |                       |                    |                       |                    |                       |       |    |

|                      |         |         |         |         |         |         |         |         |         |         |         |         |         |         |         |         |         |          |         |         |         |       |       |       |       |       |       |       |       |         |       |       |       |
|----------------------|---------|---------|---------|---------|---------|---------|---------|---------|---------|---------|---------|---------|---------|---------|---------|---------|---------|----------|---------|---------|---------|-------|-------|-------|-------|-------|-------|-------|-------|---------|-------|-------|-------|
| XAD019               | 4.9E-03 | 2.7E-03 | 2.6E-03 | 2.3E-03 | 5.1E-03 | 3.4E-03 | 3.1E-03 | 3.7E-03 | 2.7E-03 | 2.7E-03 | 2.9E-03 | 3.3E-03 | 3.4E-03 | 1.3E-03 | 3.6E-03 | 1.4E-03 | 3.1E-03 | 4.7E-04  | 2.8E-03 | 4.4E-04 | 1.1     | 0.856 | 0.9   | 0.778 | 0.8   | 0.529 | 0.8   | 0.451 | 0.9   | 0.437   |       |       |       |
| Cytidine             | 3.9E-04 | 6.2E-04 | 3.7E-04 | 3.9E-04 | 4.2E-04 | 3.9E-04 | 3.9E-04 | 3.9E-04 | 3.9E-04 | 3.9E-04 | 3.9E-04 | 3.9E-04 | 3.9E-04 | 3.9E-04 | 3.9E-04 | 3.9E-04 | 3.9E-04 | 3.9E-04  | 3.9E-04 | 3.9E-04 | 3.9E-04 | 1.1   | 0.707 | 1.1   | 0.565 | 1.1   | 0.722 | 1.1   | 0.228 | 1.1     | 0.278 |       |       |
| CDP-uridine          | 4.2E-04 | 5.6E-04 | 4.8E-04 | 3.3E-04 | 5.7E-04 | 6.4E-04 | 6.1E-04 | 5.6E-04 | 4.3E-04 | 5.1E-04 | 4.7E-04 | 5.0E-04 | 4.8E-04 | 7.1E-05 | 5.1E-04 | 1.6E-04 | 5.3E-04 | 0.97E-05 | 4.9E-04 | 3.2E-05 | 1.1     | 0.815 | 1.1   | 0.532 | 1.0   | 0.875 | 1.0   | 0.860 | 0.9   | 0.550   |       |       |       |
| Choline              | 3.7E-03 | 4.1E-03 | 4.0E-03 | 4.2E-03 | 4.2E-03 | 4.1E-03 | 4.5E-03 | 5.4E-03 | 4.4E-03 | 4.7E-03 | 5.0E-03 | 3.9E-03 | 2.2E-04 | 4.2E-03 | 2.5E-03 | 4.8E-03 | 5.3E-04 | 4.5E-04  | 3.0E-04 | 1.1     | 0.242   | 1.2   | 0.102 | 1.3   | 0.006 | **    | 1.2   | 0.028 | *     | 1.1     | 0.348 |       |       |
| AMP                  | 7.5E-04 | 8.9E-04 | 7.0E-04 | 5.6E-04 | 9.2E-04 | 8.1E-04 | 7.9E-04 | 7.4E-04 | 1.1E-03 | 1.1E-03 | 1.0E-03 | 7.8E-04 | 1.0E-04 | 8.2E-04 | 2.2E-04 | 7.8E-04 | 3.4E-05 | 1.0E-03  | 3.3E-05 | 1.1     | 0.798   | 1.0   | 0.992 | 1.3   | 0.034 | **    | 1.3   | 0.224 | 1.3   | 6.7E-04 | ***   |       |       |
| TP                   | 8.2E-03 | 7.9E-03 | 5.2E-03 | 7.6E-03 | 8.0E-03 | 6.7E-03 | 6.9E-03 | 7.8E-03 | 7.6E-03 | 6.5E-03 | 6.5E-03 | 7.1E-03 | 1.6E-03 | 7.4E-03 | 7.1E-04 | 7.1E-03 | 4.2E-04 | 6.5E-03  | 1.1E-03 | 1.1     | 0.755   | 1.0   | 0.976 | 1.0   | 0.976 | 0.9   | 0.650 | 0.9   | 0.285 | 0.9     | 0.439 |       |       |
| ClA                  | 4.9E-01 | 3.4E-01 | 3.5E-01 | 4.1E-01 | 4.1E-01 | 4.1E-01 | 4.1E-01 | 4.4E-01 | 4.4E-01 | 3.8E-01 | 3.8E-01 | 3.8E-01 | 3.8E-01 | 1.0E-02 | 4.1E-01 | 7.0E-01 | 3.0E-02 | 4.0E-01  | 4.2E-02 | 1.0     | 0.728   | 1.0   | 0.972 | 1.0   | 1.0   | 1.0   | 0.972 | 1.0   | 1.0   | 0.552   | 1.1   | 0.516 |       |
| XC0312               | 5.6E-04 | 5.9E-04 | 6.5E-04 | 5.7E-04 | 6.8E-04 | 6.2E-04 | 5.7E-04 | 6.5E-04 | 6.9E-04 | 6.6E-04 | 6.0E-04 | 4.9E-05 | 6.3E-04 | 5.5E-05 | 5.5E-04 | 2.6E-05 | 6.6E-04 | 2.3E-05  | 1.0     | 0.860   | 0.9     | 0.222 | 1.1   | 0.140 | 1.1   | 0.140 | 1.1   | 0.370 | 1.2   | 0.005   | **    |       |       |
| XCD016               | 9.2E-04 | 7.4E-04 | 8.4E-04 | 6.4E-04 | 1.0E-03 | 8.5E-04 | 7.2E-04 | 6.7E-04 | 7.6E-04 | 1.1E-03 | 9.8E-04 | 8.8E-04 | 8.7E-05 | 8.7E-05 | 2.0E-04 | 7.2E-04 | 4.2E-05 | 9.7E-04  | 9.4E-05 | 1.0     | 0.804   | 0.9   | 0.128 | 1.2   | 0.135 | 1.1   | 0.482 | 1.4   | 0.027 | *       |       |       |       |
| XAD003               | 3.9E-04 | 4.4E-04 | 3.8E-04 | 7.7E-04 | 2.9E-04 | 4.4E-04 | 1.8E-04 | 3.9E-04 | 3.4E-04 | 3.9E-04 | 3.4E-04 | 3.9E-04 | 3.4E-04 | 3.9E-04 | 3.4E-04 | 3.9E-04 | 3.4E-04 | 3.9E-04  | 3.4E-04 | 1.0     | 0.950   | 0.8   | 0.427 | 1.5   | 0.216 | 1.7   | 0.350 | 1.7   | 0.437 | 1.7     | 0.157 |       |       |
| Gly-Asp              | 2.1E-04 | 2.0E-04 | 2.5E-04 | 1.8E-04 | 2.8E-04 | 2.1E-04 | 2.0E-04 | 1.9E-04 | 2.3E-04 | 2.7E-04 | 2.3E-04 | 2.4E-04 | 2.2E-04 | 2.6E-05 | 2.2E-04 | 4.8E-05 | 2.1E-04 | 1.7E-05  | 2.5E-04 | 2.1E-05 | 1.0     | 0.859 | 1.0   | 0.594 | 1.1   | 0.219 | 1.1   | 0.525 | 1.2   | 0.072   | *     |       |       |
| Thiamine             | 8.1E-04 | 7.9E-04 | 8.8E-04 | 6.8E-04 | 8.6E-04 | 7.9E-04 | 1.0E-03 | 6.5E-04 | 5.4E-04 | 7.3E-04 | 9.8E-04 | 1.0E-03 | 8.3E-04 | 4.8E-05 | 8.5E-04 | 1.7E-04 | 6.4E-04 | 9.8E-05  | 4.1E-05 | 1.0     | 0.840   | 0.8   | 0.400 | 1.2   | 0.013 | **    | 1.2   | 0.283 | 1.5   | 0.013   | *     |       |       |
| Thiamine phosphate   | 3.3E-04 | 5.0E-04 | 3.7E-04 | 6.8E-04 | 2.9E-04 | 2.5E-04 | 4.2E-04 | 4.8E-04 | 4.2E-04 | 4.4E-04 | 3.3E-04 | 2.9E-04 | 4.0E-04 | 2.8E-05 | 4.1E-04 | 2.4E-04 | 4.4E-04 | 3.5E-05  | 3.5E-04 | 7.7E-05 | 1.0     | 0.964 | 1.1   | 0.548 | 0.9   | 0.515 | 0.9   | 0.733 | 0.8   | 0.181   | *     |       |       |
| Xanthosine           | 1.1E-03 | 8.1E-04 | 6.8E-04 | 6.3E-04 | 7.7E-04 | 1.1E-03 | 6.6E-04 | 7.3E-04 | 8.8E-04 | 7.5E-04 | 7.0E-04 | 8.3E-04 | 8.6E-04 | 2.5E-04 | 2.5E-04 | 3.7E-04 | 6.9E-05 | 7.8E-04  | 9.1E-05 | 1.0     | 0.958   | 0.9   | 0.579 | 0.9   | 0.779 | 0.9   | 0.722 | 0.9   | 0.173 | 1.1     | 0.492 |       |       |
| Citric acid          | 4.9E-03 | 4.8E-03 | 4.1E-03 | 3.4E-03 | 5.7E-03 | 4.9E-03 | 4.9E-03 | 4.2E-03 | 4.2E-03 | 4.3E-03 | 3.6E-03 | 4.6E-03 | 4.6E-03 | 4.5E-04 | 4.7E-03 | 1.2E-03 | 4.4E-03 | 3.8E-04  | 4.2E-03 | 5.1E-04 | 1.0     | 0.938 | 1.0   | 0.642 | 0.9   | 0.317 | 0.9   | 0.536 | 0.9   | 0.493   | *     |       |       |
| acetylneuraminat     | 7.8E-02 | 6.5E-02 | 7.9E-02 | 7.6E-02 | 7.1E-02 | 7.4E-02 | 7.2E-02 | 7.7E-02 | 7.8E-02 | 8.4E-02 | 7.3E-02 | 7.8E-02 | 7.3E-02 | 7.5E-03 | 7.4E-02 | 2.5E-03 | 7.5E-02 | 3.4E-03  | 7.8E-02 | 5.5E-03 | 1.0     | 0.882 | 1.0   | 0.682 | 1.1   | 0.420 | 1.1   | 0.325 | **    | 1.0     | 0.514 | *     |       |
| His                  | 4.0E-04 | 4.0E-04 | 3.8E-04 | 3.9E-04 | 4.5E-04 | 3.9E-04 | 3.9E-04 | 4.2E-04 | 4.5E-04 | 4.7E-04 | 6.1E-04 | 6.5E-04 | 3.9E-04 | 7.6E-04 | 3.9E-04 | 7.6E-04 | 4.0E-04 | 5.1E-05  | 4.2E-04 | 3.1E-05 | 0.924   | 1.1   | 0.286 | 1.7   | 0.223 | **    | 1.7   | 0.009 | **    | 1.6     | 0.018 |       |       |
| Gly-Gly              | 3.5E-02 | 2.2E-02 | 3.1E-02 | 3.4E-02 | 2.4E-02 | 2.9E-02 | 3.1E-02 | 3.4E-02 | 3.5E-02 | 1.2E-02 | 2.5E-02 | 2.0E-02 | 2.9E-02 | 6.6E-03 | 2.9E-02 | 4.7E-03 | 3.3E-02 | 2.2E-03  | 1.9E-02 | 6.6E-03 | 1.0     | 0.963 | 1.1   | 0.387 | 0.7   | 0.140 | 0.7   | 0.115 | 0.6   | 0.053   | *     |       |       |
| Glucose 6-phosphate  | 3.4E-03 | 2.0E-03 | 3.2E-03 | 3.8E-03 | 2.3E-03 | 2.4E-03 | 2.3E-03 | 2.7E-03 | 3.3E-03 | 3.1E-03 | 3.3E-03 | 3.1E-03 | 3.3E-03 | 2.9E-03 | 2.9E-03 | 2.5E-03 | 2.9E-03 | 3.0E-03  | 3.0E-03 | 2.9E-03 | 1.0     | 0.963 | 1.0   | 0.825 | 0.8   | 0.379 | 0.8   | 0.406 | 0.7   | 0.266   | *     |       |       |
| AMP                  | 1.1E-01 | 1.1E-01 | 1.2E-01 | 9.7E-02 | 1.2E-01 | 1.2E-01 | 1.2E-01 | 1.2E-01 | 1.2E-01 | 1.7E-01 | 1.6E-01 | 1.6E-01 | 1.1E-01 | 2.5E-03 | 1.1E-01 | 1.3E-02 | 1.2E-01 | 3.0E-03  | 1.6E-01 | 6.4E-01 | 1.0     | 0.846 | 1.1   | 0.053 | 1.4   | 0.002 | **    | 1.4   | 0.010 | **      | 1.4   | 0.002 | **    |
| Creatinine           | 1.3E-03 | 1.3E-03 | 9.9E-04 | 1.2E-03 | 1.4E-03 | 1.1E-03 | 1.1E-03 | 1.1E-03 | 1.1E-03 | 1.4E-03 | 1.0E-03 | 1.1E-03 | 1.2E-03 | 2.1E-04 | 1.2E-03 | 1.5E-04 | 1.1E-03 | 4.6E-05  | 2.2E-04 | 1.0     | 0.881   | 0.9   | 0.439 | 1.0   | 0.844 | 1.0   | 0.936 | 1.1   | 0.609 | 1.1     | 0.609 | 1.1   | 0.609 |
| Asn                  | 9.1E-03 | 6.3E-03 | 5.9E-03 | 7.4E-03 | 6.6E-03 | 6.9E-03 | 6.4E-03 | 6.3E-03 | 6.4E-03 | 7.5E-03 | 6.7E-03 | 6.7E-03 | 6.4E-03 | 9.0E-04 | 6.1E-03 | 4.0E-03 | 6.3E-03 | 3.7E-04  | 2.5E-04 | 1.1     | 0.834   | 0.9   | 0.976 | 1.0   | 0.976 | 0.9   | 0.650 | 0.9   | 0.285 | 0.9     | 0.439 |       |       |
| Kynurenine           | 1.5E-04 | 1.6E-04 | 1.6E-04 | 2.1E-04 | 1.7E-04 | 8.5E-05 | 1.4E-04 | 1.2E-04 | 1.5E-04 | 1.7E-04 | 2.5E-04 | 2.6E-04 | 1.6E-04 | 9.1E-06 | 1.5E-04 | 6.2E-05 | 1.4E-04 | 1.1E-05  | 2.3E-04 | 4.7E-05 | 1.0     | 0.932 | 0.9   | 0.079 | 1.5   | 0.112 | 1.5   | 0.170 | 1.7   | 0.070   | 1.7   | 0.070 |       |
| FD divalent          | 1.2E-03 | 1.1E-03 | 1.2E-03 | 9.6E-04 | 1.2E-03 | 1.3E-03 | 1.1E-03 | 1.2E-03 | 1.3E-03 | 1.3E-03 | 1.1E-03 | 1.2E-03 | 1.3E-03 | 1.1E-03 | 1.2E-03 | 1.1E-03 | 1.4E-03 | 8.4E-05  | 1.1E-03 | 1.1E-04 | 1.0     | 0.800 | 0.9   | 0.305 | 1.1   | 0.412 | 1.1   | 0.464 | 1.1   | 0.181   | 1.1   | 0.181 |       |
| N <sup>2</sup>       | 2.3E-04 | 1.3E-04 | 1.0E-04 | 1.4E-04 | 1.7E-04 | 1.4E-04 | 1.5E-04 | 1.4E-04 | 1.5E-04 | 1.7E-04 | 2.6E-04 | 1.6E-04 | 1.8E-04 | 1.5E-04 | 1.7E-04 | 3.0E-05 | 1.5E-04 | 1.5E-05  | 2.7E-05 | 2.0E-04 | 1.0     | 0.921 | 1.0   | 0.916 | 1.3   | 0.425 | 1.3   | 0.229 | 1.3   | 0.229   | 1.3   | 0.229 |       |
| Acetylperindone      | 2.5E-03 | 1.8E-03 | 2.4E-03 | 1.6E-03 | 2.3E-03 | 2.5E-03 | 1.5E-03 | 1.4E-03 | 1.8E-03 | 2.0E-03 | 1.6E-03 | 1.9E-03 | 2.2E-03 | 3.9E-04 | 2.1E-03 | 4.8E-04 | 1.6E-03 | 2.2E-04  | 1.8E-03 | 3.2E-04 | 1.0     | 0.851 | 0.7   | 0.069 | 0.8   | 0.232 | 0.9   | 0.425 | 1.2   | 0.188   | *     |       |       |
| nic acid             | 4.0E-02 | 3.8E-02 | 2.8E-02 | 3.1E-02 | 3.8E-02 | 3.5E-02 | 3.8E-02 | 3.6E-02 | 4.0E-02 | 4.2E-02 | 3.2E-02 | 3.4E-02 | 3.6E-02 | 5.7E-03 | 3.5E-02 | 3.6E-02 | 3.7E-02 | 2.3E-03  | 3.6E-02 | 5.1E-03 | 1.0     | 0.764 | 1.0   | 0.760 | 1.0   | 0.868 | 1.0   | 0.700 | 1.0   | 0.770   | 1.0   | 0.770 |       |
| Pha                  | 1.6E-04 | 1.4E-04 | 1.6E-04 | 1.4E-04 | 1.7E-04 | 1.5E-04 | 1.7E-04 | 1.5E-04 | 1.7E-04 | 1.5E-04 | 1.7E-04 | 1.5E-04 | 1.7E-04 | 1.5E-04 | 1.7E-04 | 1.5E-04 | 1.7E-04 | 1.5E-04  | 1.7E-04 | 1.5E-04 | 1.0     | 0.807 | 1.0   | 0.680 | 0.9   | 0.183 | 0.9   | 0.536 | 0.9   | 0.100   | 0.9   | 0.100 |       |
| Glycylneurami        | 1.1E-03 | 1.1E-03 | 1.2E-03 | 9.0E-04 | 9.7E-04 | 1.4E-03 | 1.0E-03 | 1.1E-03 | 1.4E-03 | 1.3E-03 | 1.2E-03 | 1.2E-03 | 1.1E-03 | 5.0E-05 | 1.1E-03 | 3.2E-04 | 1.2E-03 | 1.8E-04  | 1.2E-03 | 4.2E-05 | 1.0     | 0.813 | 1.0   | 0.771 | 1.1   | 0.094 | 1.1   | 0.505 | 1.0   | 0.697   | 1.0   | 0.697 |       |
| Threonic acid        | 8.2E-04 | 6.4E-04 | 7.0E-04 | 6.1E-04 | 7.5E-04 | 7.1E-04 | 6.4E-04 | 6.8E-04 | 6.3E-04 | 6.9E-04 | 6.4E-04 | 6.4E-04 | 7.2E-04 | 9.1E-05 | 6.9E-04 | 7.1E-05 | 6.5E-04 | 2.6E-05  | 6.6E-04 | 3.0E-05 | 1.0     | 0.671 | 0.9   | 0.314 | 0.9   | 0.364 | 1.0   | 0.540 | 1.0   | 0.741   | 1.0   | 0.741 |       |
| Ala-Ala              | 7.2E-04 | 6.1E-04 | 7.2E-04 | 4.9E-04 | 7.3E-04 | 7.4E-04 | 7.2E-04 | 7.5E-04 | 6.1E-04 | 9.3E-04 | 6.8E-04 | 6.4E-04 | 9.3E-04 | 6.8E-04 | 6.4E-04 | 9.3E-04 | 6.8E-04 | 6.4E-04  | 9.3E-04 | 6.8E-04 | 1.1     | 0.741 | 1.1   | 0.180 | 1.4   | 0.012 | 1.4   | 0.069 | 1.2   | 0.010   | 1.2   | 0.010 |       |
| Thiamine diphosphate | 5.2E-04 | 5.7E-04 | 5.3E-04 | 4.5E-04 | 5.6E-04 | 5.4E-04 | 4.4E-04 | 5.0E-04 | 4.9E-04 | 4.8E-04 | 3.8E-04 | 3.8E-04 | 5.4E-04 | 2.7E-05 | 5.1E-04 | 6.0E-05 | 4.8E-04 | 3.1E-05  | 4.1E-04 | 6.1E-05 | 0.9     | 0.514 | 0.9   | 0.057 | 0.8   | 0.046 | **    | 0.8   | 0.098 | 0.9     | 0.172 | 0.9   | 0.172 |
| Dithiothalamate      | 2.0E-04 | 1.7E-04 | 2.8E-04 | 3.0E-04 | 1.7E-04 | 1.4E-04 | 3.1E-04 | 1.1E-04 | 1.4E-04 | 1.4E-04 | 1.4E-04 | 1.4E-04 | 1.4E-04 | 2.1E-04 | 5.7E-05 | 2.0E-04 | 8.5E-05 | 1.8E-04  | 1.1E-04 | 4.8E-04 | 0.9     | 0.851 | 0.9   | 0.704 | 0.8   | 0.439 | 0.9   | 0.695 | 1.0   | 0.932   | 1.0   | 0.932 |       |
| NAD <sup>+</sup>     | 1.6E-02 | 2.5E-02 | 2.5E-02 | 1.5E-02 | 2.3E-02 | 2.4E-02 | 2.0E-02 | 2.1E-02 | 2.3E-02 | 1.6E-02 | 1.6E-02 | 1.6E-02 | 2.2E-02 | 5.3E-03 | 2.1E-02 | 6.3E-03 | 2.1E-02 | 1.3E-03  | 1.6E-02 | 5.6E-04 | 0.9     | 0.786 | 1.0   | 0.854 | 0.7   | 0.172 | 0.8   | 0.237 | 0.7   | 0.009   | **    |       |       |
| XC0137               | 5.8E-03 | 5.8E-03 | 5.3E-03 | 5.3E-03 | 5.3E-03 | 5.3E-03 | 5.3E-03 | 5.3E-03 | 5.3E-03 | 5.3E-03 | 5.3E-03 | 5.3E-03 | 5.3E-03 | 5.3E-03 | 5.3E-03 | 5.3E-03 | 5.3E-03 | 5.3E-03  | 5.3E-03 | 5.3E-03 | 1.1     | 0.834 | 0.9   | 0.650 | 0.9   | 0.285 | 0.9   | 0.439 | 0.9   |         |       |       |       |



|                               |         |         |         |         |         |         |         |         |         |         |         |         |         |         |         |         |         |         |         |         |      |       |      |       |       |       |       |       |       |       |       |       |    |  |
|-------------------------------|---------|---------|---------|---------|---------|---------|---------|---------|---------|---------|---------|---------|---------|---------|---------|---------|---------|---------|---------|---------|------|-------|------|-------|-------|-------|-------|-------|-------|-------|-------|-------|----|--|
| Butyrylcamitine               | 8.7E-03 | 3.4E-03 | 6.9E-03 | 8.6E-04 | 4.4E-03 | 3.2E-03 | 2.0E-02 | 2.7E-02 | 2.1E-02 | 7.1E-03 | 8.6E-03 | 5.9E-03 | 6.3E-03 | 2.7E-03 | 2.8E-03 | 1.8E-03 | 2.3E-02 | 3.6E-03 | 7.2E-03 | 1.3E-03 | 0.4  | 0.140 | 3.6  | 0.004 | **    | 1.1   | 0.645 | 2.6   | 0.030 | *     | 0.3   | 0.010 | ** |  |
| 5-Aminovaleric acid           | 1.2E-02 | 1.1E-02 | 1.4E-02 | 3.8E-03 | 7.6E-03 | 4.6E-03 | 1.2E-02 | 1.1E-02 | 1.3E-02 | 8.3E-03 | 8.9E-03 | 8.6E-03 | 1.2E-02 | 1.6E-03 | 5.4E-03 | 2.0E-03 | 1.2E-02 | 6.8E-04 | 8.6E-03 | 2.9E-04 | 0.4  | 0.011 | *    | 1.0   | 0.696 | 0.7   | 0.054 | 1.6   | 0.104 | 0.7   | 0.007 | **    |    |  |
| 2-Aminoadipic acid            | 6.2E-03 | 2.6E-03 | 1.6E-03 | 1.2E-03 | 1.5E-03 | 1.5E-03 | 2.3E-03 | 2.1E-03 | 1.7E-03 | 3.0E-03 | 2.3E-03 | 1.8E-03 | 3.5E-03 | 2.4E-03 | 1.4E-03 | 1.7E-04 | 2.1E-03 | 3.2E-04 | 2.4E-03 | 5.9E-04 | 0.4  | 0.275 | 0.6  | 0.417 | 0.7   | 0.516 | 1.7   | 0.097 | 1.2   | 0.479 |       |       |    |  |
| XX0040                        | 6.1E-04 | 7.4E-04 | 8.0E-04 | 1.6E-04 | 4.2E-04 | 2.2E-04 | 7.4E-04 | 7.3E-04 | 5.6E-04 | 4.8E-04 | 5.4E-04 | 6.8E-04 | 7.2E-04 | 9.7E-05 | 2.7E-04 | 1.3E-04 | 6.7E-04 | 9.9E-05 | 5.7E-04 | 1.0E-04 | 0.4  | 0.011 | *    | 0.9   | 0.601 | 0.8   | 0.138 | 2.1   | 0.039 | *     | 0.8   | 0.268 |    |  |
| N <sup>5</sup> -Methyllysine  | 5.9E-04 | 3.9E-04 | 3.9E-04 | 1.9E-04 | 1.7E-04 | 1.3E-04 | 5.1E-04 | 4.7E-04 | 4.9E-04 | 2.0E-04 | 2.9E-04 | 2.3E-04 | 4.6E-04 | 1.1E-04 | 1.6E-04 | 2.7E-05 | 4.9E-04 | 2.3E-05 | 2.4E-04 | 4.7E-05 | 0.4  | 0.039 | *    | 1.1   | 0.657 | 0.5   | 0.063 | 1.5   | 0.085 | 0.5   | 0.004 | **    |    |  |
| 1H-Imidazole-4-propionic acid | 3.0E-04 | 1.9E-04 | 3.5E-04 | 7.0E-05 | 1.5E-04 | 6.7E-05 | 4.3E-04 | 2.0E-04 | 2.4E-04 | 9.1E-05 | 9.3E-05 | 8.3E-05 | 2.8E-04 | 8.1E-05 | 9.7E-05 | 4.9E-05 | 2.9E-04 | 1.2E-04 | 8.9E-05 | 5.0E-06 | 0.3  | 0.036 | *    | 1.0   | 0.933 | 0.3   | 0.053 | 0.9   | 0.804 | 0.3   | 0.102 |       |    |  |
| Betonicine                    | 5.5E-04 | 4.7E-04 | 6.7E-04 | 1.3E-04 | 2.8E-04 | 1.6E-04 | 5.7E-04 | 6.1E-04 | 5.1E-04 | 3.8E-04 | 5.6E-04 | 4.2E-04 | 5.6E-04 | 9.7E-05 | 1.9E-04 | 7.6E-05 | 5.6E-04 | 5.5E-05 | 4.5E-04 | 9.4E-05 | 0.3  | 0.007 | **   | 1.0   | 0.393 | 0.8   | 0.234 | 2.4   | 0.021 | *     | 0.8   | 0.176 |    |  |
| Ethyl                         | 1.7E-03 | 8.3E-04 | 2.8E-03 | 7.9E-04 | 4.8E-04 | 2.0E-04 | 5.4E-04 | 1.5E-03 | 1.4E-03 | 1.3E-03 | 4.9E-03 | 3.2E-03 | 1.9E-03 | 1.0E-03 | 4.9E-04 | 3.0E-04 | 1.2E-03 | 5.4E-04 | 3.1E-03 | 1.9E-03 | 0.3  | 0.149 | 0.7  | 0.420 | 1.8   | 0.337 | 6.3   | 0.122 | 2.7   | 0.192 |       |       |    |  |
| UDP-glucuronic acid           | 4.6E-03 | 4.4E-03 | 5.9E-03 | 3.5E-04 | 2.0E-03 | 6.6E-04 | 4.3E-03 | 3.7E-03 | 2.7E-03 | 1.8E-03 | 3.2E-03 | 3.5E-03 | 5.0E-03 | 7.7E-04 | 1.0E-03 | 8.6E-04 | 3.6E-03 | 8.1E-04 | 2.8E-03 | 8.9E-04 | 0.2  | 0.004 | **   | 0.7   | 0.092 | 0.6   | 0.034 | *     | 2.8   | 0.064 | 0.8   | 0.343 |    |  |
| Putrescine                    | 1.6E-03 | 1.6E-03 | 2.3E-03 | 1.7E-04 | 1.9E-04 | 1.0E-04 | 1.4E-03 | 1.4E-03 | 8.8E-04 | 1.5E-04 | 6.2E-04 | 3.3E-04 | 1.8E-03 | 3.8E-04 | 1.5E-04 | 4.6E-05 | 1.2E-03 | 3.1E-04 | 3.7E-04 | 2.3E-04 | 0.09 | 0.016 | *    | 0.7   | 0.111 | 0.2   | 0.009 | **    | 2.4   | 0.251 | 0.3   | 0.021 | *  |  |
| N-Methylalanine               | 2.3E-04 | 1.6E-04 | 1.4E-04 | N.D.    | N.D.    | N.D.    | N.D.    | 1.1E-04 | N.D.    | 1.4E-04 | 1.4E-04 | N.D.    | 1.8E-04 | 4.5E-05 | N.D.    | N.A.    | 1.1E-04 | N.A.    | 1.4E-04 | 1.4E-06 | <1   | N.A.  | 0.6  | N.A.  | 0.8   | 0.324 | <1    | N.A.  | 1.3   | N.A.  | N.A.  |       |    |  |
| Butyric acid                  | N.D.    | N.D.    | N.D.    | N.D.    | N.D.    | N.D.    | 3.1E-04 | 6.4E-04 | 3.5E-04 | N.D.    | 2.9E-04 | N.D.    | N.D.    | N.A.    | N.D.    | N.A.    | 4.4E-04 | 1.8E-04 | 2.9E-04 | N.A.    | N.A. | 1<    | N.A. | 1<    | N.A.  | 1<    | N.A.  | 1<    | N.A.  | 0.7   | N.A.  | N.A.  |    |  |
| Cytosine                      | N.D.    | N.D.    | N.D.    | N.D.    | N.D.    | N.D.    | 4.3E-05 | 5.7E-05 | 8.7E-05 | N.D.    | N.D.    | N.D.    | N.D.    | N.A.    | N.D.    | N.A.    | 6.2E-05 | 2.2E-05 | N.D.    | N.A.    | N.A. | 1<    | N.A. | 1<    | N.A.  | N.A.  | N.A.  | N.A.  | N.A.  | <1    | N.A.  | N.A.  |    |  |

N.D.: Not Detected.

N.A.: Not Available.

† in the case of A vs B, the ratio of the average was calculated as A/B.

‡ Welch's t-test, p-value (\*<0.05, \*\*<0.01, \*\*\*<0.001)

Description of XA... or XC... in compound name indicates unknown peaks, which has been detected in some other organism samples in the HMT database for metabolite identification.
