# Supplementary material for: Chronic Intake of Japanese Sake Mediates Radiation-Induced Metabolic Alterations in Mouse Liver
Source: PubMed Central journal article supplement (PMC4713437; doi:10.1371/journal.pone.0146730), 2016-01-11
Supplement: pone.0146730.s007.pdf [file pone.0146730.s007.pdf]

S4 Table. Metabolome data for the liver of irradiated mice administered 15% ethanol. Values represent the relative areas of each metabolite peak to the peak area of an internal standard.

| Compound name        | Relative Area |         |         |         |         |         |         |         |         |             |         |         | Comparative Analysis |         |                    |         |                        |         |                    |         |                        |                       |                    |                       |                    |                       |                    |                       |                    |                       |       |       |       |
|----------------------|---------------|---------|---------|---------|---------|---------|---------|---------|---------|-------------|---------|---------|----------------------|---------|--------------------|---------|------------------------|---------|--------------------|---------|------------------------|-----------------------|--------------------|-----------------------|--------------------|-----------------------|--------------------|-----------------------|--------------------|-----------------------|-------|-------|-------|
|                      | control       |         |         | rad     |         |         | ethanol |         |         | ethanol+rad |         |         | rad vs control       |         | ethanol vs control |         | ethanol+rad vs control |         | ethanol+rad vs rad |         | ethanol+rad vs ethanol |                       |                    |                       |                    |                       |                    |                       |                    |                       |       |       |       |
|                      | 1             | 2       | 3       | 4       | 5       | 6       | 7       | 8       | 9       | 10          | 11      | 12      | Mean                 | S.D.    | Mean               | S.D.    | Mean                   | S.D.    | Mean               | S.D.    | Ratio <sup>†</sup>     | p-value <sup>††</sup> | Ratio <sup>†</sup> | p-value <sup>††</sup> | Ratio <sup>†</sup> | p-value <sup>††</sup> | Ratio <sup>†</sup> | p-value <sup>††</sup> | Ratio <sup>†</sup> | p-value <sup>††</sup> |       |       |       |
| UDP-glucose          | 1.2E-02       | 9.7E-03 | 1.5E-02 | 2.5E-02 | 2.3E-02 | 2.7E-02 | 1.5E-02 | 1.5E-02 | 1.6E-02 | 2.7E-02     | 2.5E-02 | 1.8E-02 | 1.2E-02              | 2.4E-03 | 2.6E-02            | 1.1E-03 | 1.6E-02                | 6.2E-04 | 2.4E-02            | 4.7E-03 | 2.1                    | 0.004                 | **                 | 1.3                   | 0.131              | 2.0                   | 0.033              | *                     | 0.9                | 0.517                 | 1.5   | 0.092 |       |
| UDP-galactose        | 2.1E-04       | 2.4E-04 | 3.4E-04 | 5.7E-04 | 5.7E-04 | 5.2E-04 | 2.7E-04 | 3.1E-04 | 3.6E-04 | 3.3E-04     | 5.7E-04 | 3.4E-04 | 2.6E-04              | 6.9E-05 | 5.6E-04            | 3.1E-05 | 3.1E-04                | 4.6E-05 | 4.2E-04            | 1.4E-04 | 2.1                    | 0.008                 | **                 | 1.2                   | 0.364              | 1.6                   | 0.184              | 0.7                   | 0.214              | 1.3                   | 0.321 |       |       |
| Rhein                | 1.2E-04       | 2.4E-05 | 7.4E-05 | 7.5E-05 | 1.3E-04 | 1.9E-04 | 1.6E-04 | 7.1E-05 | 1.4E-04 | 1.5E-04     | 8.3E-05 | N.D.    | 7.2E-05              | 4.6E-05 | 1.3E-04            | 6.0E-05 | 1.2E-04                | 4.7E-05 | 1.2E-04            | 4.7E-05 | 1.6                    | 0.245                 | *                  | 1.7                   | 0.238              | 1.6                   | 0.392              | 0.9                   | 0.768              | 0.9                   | 0.867 |       |       |
| Tetrahydrobiopterin  | 5.3E-03       | 6.8E-03 | 7.6E-03 | 1.0E-02 | 1.1E-02 | 1.1E-02 | 1.9E-02 | 3.8E-03 | 8.7E-03 | 7.2E-03     | 6.8E-03 | 6.4E-03 | 6.5E-03              | 1.2E-03 | 1.1E-02            | 4.9E-03 | 8.6E-03                | 6.8E-03 | 4.1E-03            | 4.1E-03 | 1.8                    | 0.015                 | *                  | 1.3                   | 0.118              | 1.2                   | 0.733              | 0.6                   | 5.4E-04            | ***                   | 0.8   | 0.803 |       |
| Fructose 6-phosphate | 2.3E-02       | 3.0E-02 | 4.3E-02 | 5.2E-02 | 4.2E-02 | 3.0E-02 | 3.7E-02 | 3.6E-02 | 3.4E-02 | 3.1E-02     | 2.6E-02 | 2.9E-02 | 2.9E-02              | 5.4E-03 | 4.6E-02            | 5.2E-03 | 3.4E-02                | 3.4E-03 | 3.0E-02            | 4.1E-03 | 1.6                    | 0.017                 | *                  | 1.2                   | 0.221              | 1.0                   | 0.752              | 0.7                   | 0.016              | 0.9                   | 0.245 |       |       |
| Sorbitol             | 2.0E-04       | 2.4E-04 | 7.0E-04 | 8.2E-04 | 3.5E-04 | 6.3E-04 | 3.5E-04 | 3.9E-04 | 3.9E-04 | 3.7E-04     | 3.9E-04 | 3.7E-04 | 3.8E-04              | 2.8E-04 | 6.1E-04            | 2.4E-04 | 3.4E-04                | 5.1E-05 | 4.4E-04            | 1.0E-04 | 1.6                    | 0.350                 | 0.9                | 0.836                 | 1.2                | 0.751                 | 0.7                | 0.359                 | 1.3                | 0.224                 |       |       |       |
| XA005                | 2.6E-04       | 6.4E-04 | 8.0E-04 | 7.5E-04 | 9.3E-04 | 9.3E-04 | N.D.    | 7.5E-04 | 8.7E-04 | N.D.        | 4.6E-04 | 7.7E-04 | 5.7E-04              | 2.8E-04 | 8.7E-04            | 1.0E-04 | 8.1E-04                | 8.9E-05 | 6.3E-04            | 2.2E-04 | 1.5                    | 0.191                 | 1.4                | 0.266                 | 1.1                | 0.835                 | 0.7                | 0.331                 | 0.8                | 0.417                 |       |       |       |
| Glucose 6-phosphate  | 2.0E-03       | 3.3E-03 | 3.1E-03 | 3.8E-03 | 5.1E-03 | 3.9E-03 | 2.8E-03 | 3.8E-03 | 3.2E-03 | 3.8E-03     | 3.6E-03 | 3.0E-03 | 2.8E-03              | 7.3E-04 | 4.3E-03            | 7.0E-03 | 3.4E-03                | 4.9E-04 | 3.5E-03            | 4.3E-04 | 1.5                    | 0.089                 | 1.2                | 0.445                 | 1.2                | 0.270                 | 0.8                | 0.182                 | 1.1                | 0.601                 |       |       |       |
| 2-Methylserine       | 4.7E-04       | 4.3E-04 | 4.4E-04 | 6.5E-04 | 7.9E-04 | 5.1E-04 | 7.4E-04 | 5.1E-04 | 4.8E-04 | 9.2E-04     | 7.3E-04 | 4.7E-04 | 4.5E-04              | 2.1E-05 | 6.5E-04            | 1.4E-04 | 5.8E-04                | 1.4E-04 | 7.1E-04            | 2.2E-04 | 1.4                    | 0.130                 | 1.3                | 0.244                 | 1.4                | 0.183                 | 1.1                | 0.716                 | 1.2                | 0.460                 |       |       |       |
| Uric acid            | 2.6E-03       | 3.3E-03 | 5.8E-03 | 4.8E-03 | 5.6E-03 | 6.4E-03 | 4.6E-03 | 3.6E-03 | 4.7E-03 | 5.4E-03     | 5.5E-03 | 4.4E-03 | 5.0E-03              | 3.9E-03 | 1.7E-03            | 5.6E-03 | 7.8E-04                | 4.6E-03 | 8.7E-04            | 5.0E-03 | 5.5E-04                | 1.4                   | 0.215              | 1.2                   | 0.589              | 1.3                   | 0.391              | 0.9                   | 0.318              | 1.1                   | 0.545 |       |       |
| Seoanepiurone        | N.D.          | 1.5E-04 | 3.5E-04 | 4.8E-04 | 3.9E-04 | 2.0E-04 | 1.2E-04 | 1.9E-04 | 1.1E-04 | 2.1E-04     | 2.6E-04 | 1.3E-04 | 2.5E-04              | 1.5E-04 | 3.6E-04            | 1.4E-04 | 4.2E-04                | 2.0E-04 | 6.5E-05            | 1.4     | 0.496                  | 0.6                   | 0.482              | 0.8                   | 0.718              | 0.6                   | 0.184              | 1.4                   | 0.276              |                       |       |       |       |
| Glyoxybisphenolone   | 5.7E-03       | 7.0E-03 | 8.0E-03 | 9.4E-03 | 1.2E-02 | 7.9E-03 | 6.2E-03 | 8.5E-03 | 6.0E-03 | 6.1E-03     | 7.6E-03 | 5.3E-03 | 6.9E-03              | 1.2E-03 | 9.6E-03            | 1.8E-03 | 6.9E-03                | 1.4E-03 | 6.3E-03            | 1.1E-03 | 1.4                    | 0.104                 | 1.0                | 0.984                 | 0.9                | 0.572                 | 0.7                | 0.065                 | 0.9                | 0.620                 |       |       |       |
| Ser                  | 5.4E-02       | 4.7E-02 | 4.3E-02 | 7.3E-02 | 5.7E-02 | 6.8E-02 | 5.8E-02 | 4.9E-02 | 5.6E-02 | 5.8E-02     | 6.1E-02 | 5.2E-02 | 4.8E-02              | 5.9E-03 | 6.6E-02            | 8.2E-02 | 5.4E-02                | 4.3E-02 | 5.9E-02            | 7.9E-03 | 1.4                    | 0.043                 | **                 | 1.1                   | 0.253              | 1.0                   | 0.358              | 1.1                   | 0.382              |                       |       |       |       |
| Ribose 5-phosphate   | 2.5E-02       | 3.3E-02 | 4.2E-02 | 4.2E-02 | 4.9E-02 | 4.1E-02 | 3.2E-02 | 2.7E-02 | 4.5E-02 | 4.9E-02     | 3.3E-02 | 3.9E-02 | 3.3E-02              | 8.4E-03 | 4.4E-02            | 4.3E-03 | 3.5E-02                | 2.9E-02 | 4.0E-02            | 8.0E-03 | 1.3                    | 0.133                 | 1.0                | 0.848                 | 1.2                | 0.341                 | 0.9                | 0.507                 | 1.2                | 0.459                 |       |       |       |
| Glucosamine          | 1.7E-03       | 1.7E-03 | 2.3E-03 | 2.3E-03 | 2.5E-03 | 2.9E-03 | 2.5E-03 | 3.0E-03 | 4.0E-03 | 4.1E-03     | 3.6E-03 | 4.8E-03 | 1.9E-03              | 3.4E-03 | 2.6E-03            | 2.9E-03 | 3.1E-03                | 7.6E-04 | 4.2E-03            | 6.1E-03 | 1.3                    | 0.089                 | 1.6                | 0.092                 | 2.2                | 0.010                 | **                 | 1.6                   | 0.028              | *                     | 1.3   | 0.140 |       |
| Homocysteine         | 2.1E-03       | 2.1E-03 | 2.0E-03 | 2.6E-03 | 2.9E-03 | 2.7E-03 | 3.0E-03 | 1.9E-03 | 3.1E-03 | 2.9E-03     | 2.0E-03 | 2.7E-03 | 2.1E-03              | 4.7E-05 | 2.7E-03            | 1.6E-04 | 2.7E-03                | 6.5E-04 | 2.5E-03            | 4.7E-04 | 1.3                    | 0.013                 | *                  | 1.3                   | 0.250              | 1.2                   | 0.255              | 0.9                   | 0.504              | 0.9                   | 0.730 |       |       |
| S-Methylglutathione  | 1.2E-03       | 2.2E-03 | 2.3E-03 | 2.7E-03 | 3.0E-03 | 2.7E-03 | 2.7E-03 | 2.7E-03 | 2.7E-03 | 2.7E-03     | 2.7E-03 | 2.7E-03 | 2.7E-03              | 1.3E-04 | 2.8E-03            | 1.7E-04 | 2.8E-03                | 1.0E-04 | 2.9E-03            | 1.7E-03 | 1.3                    | 0.011                 | *                  | 1.2                   | 0.005              | **                    | 1.3                | 0.005                 | **                 | 1.0                   | 0.465 | 1.1   | 0.240 |
| Glucosamine          | 9.7E-04       | 1.2E-03 | 1.1E-03 | 1.2E-03 | 1.5E-03 | 1.3E-03 | 8.2E-04 | 8.1E-04 | 8.4E-04 | 1.0E-03     | 1.0E-03 | 2.0E-03 | 1.0E-03              | 2.5E-04 | 1.3E-03            | 1.5E-04 | 8.2E-04                | 1.5E-05 | 1.4E-03            | 6.0E-04 | 1.3                    | 0.187                 | 0.8                | 0.256                 | 1.3                | 0.481                 | 1.0                | 0.945                 | 1.6                | 0.264                 |       |       |       |
| Acetyl CoA divalent  | 1.0E-04       | 1.7E-03 | 1.3E-03 | 1.2E-03 | 1.8E-03 | 1.8E-03 | 1.2E-03 | 1.1E-03 | 1.5E-03 | 9.9E-04     | 2.1E-03 | 1.3E-03 | 9.6E-04              | 1.6E-03 | 1.6E-03            | 3.5E-04 | 1.3E-03                | 2.4E-04 | 1.4E-03            | 6.5E-04 | 1.3                    | 0.312                 | 1.0                | 0.957                 | 1.0                | 0.911                 | 0.8                | 0.542                 | 1.1                | 0.878                 |       |       |       |
| His                  | 7.9E-02       | 8.7E-02 | 9.5E-02 | 1.1E-01 | 1.2E-01 | 9.6E-02 | 1.0E-01 | 9.0E-02 | 1.0E-01 | 9.4E-02     | 8.0E-02 | 9.0E-02 | 8.7E-02              | 8.0E-03 | 1.1E-01            | 1.4E-02 | 1.0E-01                | 8.0E-03 | 8.8E-02            | 7.0E-03 | 1.3                    | 0.086                 | 1.1                | 0.137                 | 1.0                | 0.929                 | 0.8                | 0.092                 | 0.9                | 0.134                 |       |       |       |
| Cytosine             | 4.1E-05       | 4.2E-05 | 3.7E-05 | 6.4E-05 | 5.1E-05 | 6.6E-05 | 3.3E-05 | 3.6E-05 | 6.3E-05 | 5.3E-05     | 6.4E-05 | 4.0E-05 | 2.3E-06              | 5.0E-05 | 1.4E-05            | 4.5E-05 | 1.8E-05                | 6.0E-05 | 6.3E-06            | 1.3     | 0.343                  | 1.1                   | 0.684              | 1.5                   | 0.025              | 1.2                   | 0.379              | 1.3                   | 0.299              |                       |       |       |       |
| cis-4-Hydroxyproline | 2.2E-04       | 1.7E-04 | 1.8E-04 | 2.3E-04 | 2.1E-04 | 2.8E-04 | 3.4E-04 | 3.2E-04 | 4.6E-04 | 3.9E-04     | 3.1E-04 | 4.1E-04 | 1.9E-04              | 2.3E-05 | 2.4E-04            | 3.7E-05 | 3.7E-04                | 7.5E-05 | 3.7E-04            | 5.3E-05 | 1.3                    | 0.146                 | 1.0                | 0.943                 | 2.0                | 0.015                 | 1.6                | 0.027                 | *                  | 1.0                   | 0.984 |       |       |
| IMP                  | 6.2E-03       | 7.7E-03 | 7.4E-03 | 9.5E-03 | 1.0E-02 | 7.0E-03 | 8.0E-03 | 7.4E-03 | 6.4E-03 | 7.0E-03     | 5.3E-03 | 6.1E-03 | 3.1E-03              | 7.1E-07 | 8.8E-03            | 1.6E-05 | 5.0E-03                | 2.0E-04 | 6.3E-03            | 8.7E-04 | 1.2                    | 0.193                 | 0.8                | 0.058                 | 0.9                | 0.281                 | 0.7                | 0.089                 | 1.1                | 0.243                 |       |       |       |
| Asp                  | 4.1E-02       | 4.9E-02 | 3.7E-02 | 4.7E-02 | 6.2E-02 | 4.7E-02 | 6.2E-02 | 5.4E-02 | 7.0E-02 | 7.1E-02     | 3.8E-02 | 4.7E-02 | 4.2E-02              | 5.8E-03 | 5.2E-02            | 8.9E-03 | 6.2E-02                | 8.2E-03 | 5.2E-02            | 1.7E-02 | 1.2                    | 0.198                 | 1.5                | 0.031                 | *                  | 1.2                   | 0.424              | 1.0                   | 0.986              | 0.8                   | 0.428 |       |       |
| Pyruvic acid         | N.D.          | 4.3E-03 | 4.1E-03 | N.D.    | 5.1E-03 | 4.2E-03 | N.D.    | N.D.    | 5.8E-03 | 5.3E-03     | 4.2E-03 | 1.4E-04 | 5.2E-03              | 1.3E-04 | 4.6E-03            | 5.9E-04 | 5.6E-03                | 3.1E-02 | 3.6E-04            | 1.2     | 0.021                  | *                     | 1.1                | 0.547                 | 1.3                | 0.069                 | 1.1                | 0.372                 | 1.2                | 0.211                 |       |       |       |
| 5-Hydroxytryptophan  | 8.8E-04       | 8.2E-04 | 1.3E-03 | 1.3E-03 | 1.1E-03 | 1.3E-03 | 9.9E-04 | 1.2E-03 | 1.9E-03 | 1.5E-03     | 1.2E-03 | 1.9E-03 | 1.0E-03              | 2.8E-04 | 1.2E-03            | 9.8E-05 | 1.3E-03                | 9.5E-04 | 1.5E-03            | 3.6E-04 | 1.2                    | 0.294                 | 1.3                | 0.431                 | 1.5                | 0.123                 | 1.2                | 0.290                 | 1.1                | 0.641                 |       |       |       |
| Cys                  | 4.6E-04       | 3.8E-04 | 5.1E-04 | 4.7E-04 | 6.9E-04 | 4.8E-04 | 6.1E-04 | 4.5E-04 | 5.3E-04 | 6.1E-04     | 6.9E-04 | 2.7E-04 | 4.5E-04              | 8.5E-05 | 5.5E-04            | 1.2E-04 | 5.3E-04                | 9.2E-05 | 5.2E-04            | 2.2E-04 | 1.2                    | 0.301                 | 1.2                | 0.224                 | 1.2                | 0.629                 | 1.0                | 0.876                 | 1.0                | 0.952                 |       |       |       |
| met-enkephalin       | 4.1E-04       | 4.9E-04 | 4.8E-04 | 5.8E-04 | 5.4E-04 | 5.4E-04 | 4.2E-04 | 3.5E-04 | 4.1E-04 | 4.3E-04     | 4.1E-04 | 4.6E-04 | 4.3E-05              | 5.5E-04 | 2.6E-05            | 3.9E-04 | 3.0E-05                | 4.2E-04 | 1.2E-05            | 1.2     | 0.036                  | *                     | 0.9                | 0.147                 | 0.9                | 0.201                 | 0.8                | 0.006                 | **                 | 1.1                   | 0.321 |       |       |
| Triethanolamine      | 1.4E-04       | N.D.    | 1.4E-04 | 1.5E-04 | 1.8E-04 | 1.8E-04 | 2.0E-04 | 1.3E-04 | 1.4E-04 | 2.1E-04     | 1.8E-04 | N.D.    | 1.4E-04              | 2.0E-06 | 1.7E-04            | 1.7E-05 | 1.6E-04                | 3.6E-05 | 2.0E-04            | 2.0E-05 | 1.2                    | 0.091                 | 1.1                | 0.459                 | 1.4                | 0.149                 | 1.2                | 0.245                 | 1.2                | 0.215                 |       |       |       |
| Triethanolamine      | 1.8E-04       | 2.0E-04 | 2.2E-04 | 2.2E-04 | 3.1E-04 | 1.9E-04 | 1.8E-04 | 1.9E-04 | 2.0E-04 | 2.3E-04     | 1.3E-04 | 2.9E-04 | 2.0E-04              | 2.0E-05 | 2.4E-04            | 6.5E-05 | 2.6E-04                | 1.4E-04 | 2.2E-04            | 5.9E-05 | 1.2                    | 0.380                 | 1.3                | 0.512                 | 1.2                | 0.741                 | 0.8                | 0.682                 |                    |                       |       |       |       |
| 1-Methylhistamine    | 7.6E-05       | 9.8E-05 | 1.2E-04 | 8.0E-05 | 1.4E-04 | 1.3E-04 | 1.2E-04 | 8.9E-05 | 1.0E-04 | 1.3E-04     | 1.0E-04 | 1.4E-04 | 9.7E-05              | 2.1E-05 | 1.2E-04            | 3.3E-05 | 1.1E-04                | 1.8E-05 | 1.2E-04            | 2.2E-05 | 1.2                    | 0.432                 | 1.1                | 0.657                 | 1.3                | 0.193                 | 1.1                | 0.774                 | 1.2                | 0.301                 |       |       |       |
| Dietaniline          | 2.5E-04       | 2.5E-04 | 3.6E-04 | 3.4E-04 | 3.6E-04 | 3.4E-04 | 4.1E-04 | 2.1E-04 | 3.2E-04 | 3.7E-04     | 3.5E-04 | 2.4E-04 | 2.9E-04              | 6.5E-05 | 3.5E-04            | 9.9E-05 | 3.1E-04                | 1.0E-04 | 3.2E-04            | 7.1E-05 | 1.2                    | 0.255                 | 1.1                | 0.724                 | 1.1                | 0.636                 | 0.9                | 0.529                 | 1.0                | 0.979                 |       |       |       |
| Glutathione (GSH)    | 4.4E-01       | 3.9E-01 | 3.8E-01 | 4.4E-01 | 5.4E-01 | 5.4E-01 | 5.6E-01 | 4.6E-01 | 4.9E-01 | 5.1E-01     | 4.6E-01 | 3.6E-01 | 4.2E-01              | 2.9E-02 | 5.0E-01            | 5.7E-02 | 5.0E-01                | 5.0E-02 | 4.4E-01            | 7.6E-02 | 1.2                    | 0.110                 | 1.2                | 0.802                 | 1.1                | 0.659                 | 0.9                | 0.337                 | 0.9                | 0                     |       |       |       |

|                                      |         |         |         |         |         |         |         |         |         |         |         |         |         |         |         |         |         |         |         |         |         |       |       |       |       |       |       |       |       |       |       |       |       |
|--------------------------------------|---------|---------|---------|---------|---------|---------|---------|---------|---------|---------|---------|---------|---------|---------|---------|---------|---------|---------|---------|---------|---------|-------|-------|-------|-------|-------|-------|-------|-------|-------|-------|-------|-------|
| Thr                                  | 4.1E-02 | 4.3E-02 | 5.1E-02 | 4.7E-02 | 4.9E-02 | 4.6E-02 | 4.8E-02 | 4.1E-02 | 5.2E-02 | 5.2E-02 | 5.1E-02 | 4.6E-02 | 4.5E-02 | 5.4E-02 | 4.7E-02 | 1.7E-03 | 4.5E-02 | 5.6E-03 | 5.0E-02 | 2.9E-03 | 1.0     | 0.566 | 1.0   | 0.692 | 1.1   | 0.272 | 1.1   | 0.282 | 1.1   | 0.497 |       |       |       |
| Spermidine                           | 3.3E-03 | 4.3E-03 | 5.8E-03 | 4.7E-03 | 5.0E-03 | 4.3E-03 | 5.6E-03 | 5.3E-03 | 5.7E-03 | 6.0E-03 | 5.7E-03 | 6.6E-03 | 6.9E-03 | 4.5E-03 | 1.2E-03 | 3.4E-04 | 5.6E-03 | 2.8E-04 | 6.1E-03 | 4.5E-04 | 1.0     | 0.813 | 1.3   | 0.250 | 1.4   | 0.142 | 1.3   | 0.014 | 1.1   | 0.211 |       |       |       |
| XC0126                               | 3.6E-04 | 3.6E-04 | 2.5E-04 | 3.3E-04 | 3.7E-04 | 3.1E-04 | 2.7E-04 | 2.5E-04 | 2.6E-04 | 2.8E-04 | 2.7E-04 | 2.9E-04 | 3.2E-04 | 4.3E-04 | 6.3E-05 | 4.7E-04 | 2.8E-05 | 2.6E-04 | 7.2E-04 | 2.7E-04 | 2.3E-05 | 1.0   | 0.785 | 0.8   | 0.226 | 0.8   | 0.294 | 0.8   | 0.040 | 1.0   | 0.482 |       |       |
| GTP                                  | 4.0E-03 | 3.4E-03 | 2.2E-03 | 3.3E-03 | 3.5E-03 | 3.2E-03 | 2.9E-03 | 2.5E-03 | 3.2E-03 | 3.1E-03 | 1.6E-03 | 1.1E-03 | 8.9E-04 | 3.2E-03 | 8.9E-04 | 3.3E-03 | 1.6E-04 | 2.9E-03 | 3.8E-04 | 1.2E-03 | 3.6E-04 | 1.0   | 0.848 | 0.9   | 0.652 | 0.4   | 0.043 | 0.4   | 0.043 | 0.4   | 0.005 |       |       |
| XAD05                                | 2.9E-03 | 2.5E-03 | 2.4E-03 | 2.6E-03 | 3.0E-03 | 3.2E-03 | 3.1E-03 | 2.8E-03 | 3.5E-03 | 2.8E-03 | 2.6E-03 | 2.6E-03 | 2.6E-03 | 3.1E-03 | 1.9E-03 | 4.4E-04 | 3.1E-03 | 4.3E-04 | 3.9E-03 | 3.2E-04 | 1.0     | 0.774 | 1.2   | 0.213 | 1.0   | 0.595 | 0.9   | 0.537 | 1.0   | 0.148 |       |       |       |
| XAD2                                 | 5.8E-03 | 5.4E-03 | 8.0E-03 | 5.9E-03 | 6.4E-03 | 7.4E-03 | 7.0E-03 | 8.8E-03 | 7.9E-03 | 7.5E-03 | 7.8E-03 | 6.4E-03 | 1.4E-03 | 6.8E-03 | 7.7E-03 | 8.1E-03 | 9.5E-04 | 7.7E-03 | 9.5E-04 | 7.7E-03 | 1.6E-04 | 1.0   | 0.857 | 1.2   | 0.168 | 1.2   | 0.245 | 1.2   | 0.120 | 1.0   | 0.563 |       |       |
| XAD12                                | 1.2E-03 | 1.4E-03 | 1.1E-03 | 1.0E-03 | 1.6E-03 | 1.3E-03 | 1.5E-03 | 1.2E-03 | 1.1E-03 | 9.1E-04 | 1.0E-03 | 1.5E-03 | 1.3E-03 | 1.6E-04 | 1.3E-03 | 3.0E-04 | 1.3E-03 | 1.9E-04 | 1.2E-03 | 3.2E-04 | 1.0     | 0.887 | 1.0   | 0.884 | 0.9   | 0.658 | 0.9   | 0.629 | 0.9   | 0.601 |       |       |       |
| Ascorbic acid                        | 3.2E-02 | 3.8E-02 | 3.1E-02 | 2.8E-02 | 3.8E-02 | 3.7E-02 | 3.4E-02 | 3.2E-02 | 3.4E-02 | 4.0E-02 | 5.3E-02 | 8.5E-03 | 3.4E-02 | 3.7E-03 | 3.4E-02 | 5.3E-03 | 3.3E-02 | 1.1E-03 | 3.4E-02 | 3.2E-02 | 1.0     | 0.848 | 1.0   | 0.933 | 1.0   | 0.985 | 1.0   | 0.974 | 1.0   | 0.974 |       |       |       |
| NMN                                  | 4.9E-04 | 3.3E-04 | 3.0E-04 | 3.8E-04 | 3.4E-04 | 4.2E-04 | 2.8E-04 | 3.2E-04 | 2.9E-04 | 2.6E-04 | 3.0E-04 | 3.7E-04 | 3.7E-04 | 1.0E-04 | 3.8E-04 | 4.0E-05 | 3.0E-04 | 1.7E-05 | 3.1E-04 | 5.4E-05 | 1.0     | 0.912 | 0.8   | 0.328 | 0.8   | 0.419 | 0.8   | 0.150 | 1.0   | 0.713 |       |       |       |
| Guanosine                            | 2.1E-03 | 1.9E-03 | 2.2E-03 | 2.1E-03 | 2.1E-03 | 4.2E-03 | 2.2E-03 | 2.6E-03 | 1.9E-03 | 2.3E-03 | 2.7E-03 | 2.4E-03 | 2.1E-03 | 1.2E-04 | 2.1E-03 | 2.8E-06 | 2.3E-03 | 3.5E-04 | 2.4E-03 | 2.1E-04 | 1.0     | 0.609 | 1.1   | 0.389 | 1.2   | 0.062 | 1.2   | 0.099 | 1.1   | 0.503 |       |       |       |
| UTP                                  | 4.8E-03 | 3.8E-03 | 2.4E-03 | 3.6E-03 | 3.3E-03 | 3.7E-03 | 4.3E-03 | 2.7E-03 | 4.6E-03 | 1.8E-03 | 1.2E-03 | 9.5E-04 | 3.5E-03 | 8.9E-04 | 3.6E-03 | 2.5E-04 | 3.8E-03 | 9.9E-04 | 1.3E-03 | 4.4E-04 | 1.0     | 0.928 | 1.1   | 0.685 | 0.4   | 0.045 | 0.4   | 0.004 | **    | 0.3   | 0.032 |       |       |
| Glycerol 3-phosphate                 | 3.3E-02 | 9.0E-02 | 8.6E-02 | 8.7E-02 | 9.1E-02 | 9.1E-02 | 9.1E-02 | 8.2E-02 | 7.1E-02 | 8.2E-02 | 9.1E-02 | 8.7E-02 | 8.8E-02 | 8.8E-02 | 9.0E-02 | 2.6E-03 | 7.9E-02 | 6.8E-03 | 9.2E-02 | 5.6E-03 | 1.0     | 0.547 | 0.9   | 0.134 | 1.0   | 0.347 | 1.0   | 0.508 | 1.2   | 0.063 |       |       |       |
| Poligalonic acid                     | 6.2E-04 | 5.3E-04 | 4.7E-04 | 5.6E-04 | 5.3E-04 | N.D.    | 6.8E-04 | 4.2E-04 | 4.7E-04 | 5.9E-04 | 5.7E-04 | 4.6E-04 | 5.4E-04 | 7.6E-05 | 5.4E-04 | 2.0E-05 | 5.2E-04 | 1.4E-04 | 5.4E-04 | 6.7E-05 | 1.0     | 0.891 | 1.0   | 0.895 | 1.0   | 0.961 | 1.0   | 0.931 | 1.0   | 0.888 |       |       |       |
| Glucose                              | 1.3E-01 | 1.8E-01 | 1.0E-01 | 1.2E-01 | 1.7E-01 | 1.3E-01 | 1.4E-01 | 1.5E-01 | 1.6E-01 | 1.5E-01 | 1.6E-01 | 1.6E-01 | 1.4E-01 | 3.8E-02 | 1.4E-01 | 2.8E-02 | 1.6E-01 | 2.0E-02 | 1.4E-01 | 3.2E-02 | 1.0     | 0.956 | 1.2   | 0.426 | 1.0   | 0.969 | 1.0   | 0.987 | 1.0   | 0.388 |       |       |       |
| Ala                                  | 1.2E-02 | 1.4E-02 | 1.2E-02 | 1.2E-02 | 1.4E-02 | 1.2E-02 | 1.9E-02 | 1.3E-02 | 1.7E-02 | 1.6E-02 | 1.3E-02 | 1.4E-02 | 1.3E-02 | 1.2E-03 | 1.3E-02 | 7.1E-04 | 1.6E-02 | 2.3E-03 | 1.4E-02 | 1.5E-03 | 1.0     | 0.879 | 1.3   | 0.108 | 1.1   | 0.108 | 1.1   | 0.243 | 1.1   | 0.246 |       |       |       |
| Hypoxanthine                         | 6.3E-03 | 1.0E-02 | 1.6E-02 | 1.1E-02 | 1.1E-02 | 1.1E-02 | 5.7E-03 | 8.2E-03 | 6.1E-03 | 8.3E-03 | 9.9E-03 | 1.1E-02 | 1.1E-02 | 4.9E-03 | 1.1E-02 | 2.9E-04 | 6.7E-03 | 1.4E-03 | 9.7E-03 | 1.4E-03 | 1.0     | 0.976 | 0.6   | 0.280 | 0.9   | 0.744 | 0.9   | 0.277 | 1.5   | 0.053 |       |       |       |
| Xanthine                             | 3.6E-03 | 6.1E-03 | 8.5E-03 | 5.8E-03 | 6.8E-03 | 5.6E-03 | 3.2E-03 | 4.2E-03 | 3.4E-03 | 4.0E-03 | 4.8E-03 | 4.3E-03 | 6.0E-03 | 2.4E-03 | 6.1E-03 | 6.5E-03 | 5.3E-04 | 4.4E-03 | 4.3E-04 | 1.0     | 0.977   | 0.6   | 0.220 | 0.7   | 0.352 | 0.7   | 0.024 | *     | 1.2   | 0.127 |       |       |       |
| GDP                                  | 4.6E-03 | 4.2E-03 | 3.1E-03 | 3.9E-03 | 3.9E-03 | 4.1E-03 | 4.2E-03 | 3.6E-03 | 3.9E-03 | 2.2E-03 | 3.7E-04 | 1.6E-03 | 4.0E-03 | 7.8E-04 | 4.0E-03 | 1.4E-04 | 3.9E-03 | 2.9E-04 | 1.4E-03 | 9.4E-04 | 1.0     | 0.954 | 1.0   | 0.918 | 0.4   | 0.024 | *     | 0.3   | 0.039 | *     | 0.4   | 0.035 |       |
| Isothionic acid                      | 3.0E-03 | 3.6E-03 | 3.1E-03 | 3.0E-03 | 3.5E-03 | 3.0E-03 | 2.3E-03 | 2.8E-03 | 2.1E-03 | 2.3E-03 | 2.6E-03 | 3.2E-03 | 3.2E-03 | 3.4E-03 | 3.3E-03 | 2.6E-04 | 2.4E-03 | 3.7E-04 | 2.7E-03 | 4.6E-04 | 1.0     | 0.937 | 0.7   | 0.044 | *     | 0.8   | 0.160 | 0.8   | 0.143 | 1.1   | 0.491 |       |       |
| Histamine                            | 1.5E-04 | 1.9E-04 | 1.8E-04 | 1.8E-04 | 1.6E-04 | 1.8E-04 | 1.4E-04 | 1.2E-04 | 1.5E-04 | 5.7E-05 | 1.5E-04 | 1.9E-04 | 1.7E-04 | 2.5E-05 | 1.8E-04 | 1.1E-05 | 1.4E-04 | 1.5E-05 | 1.3E-04 | 6.8E-05 | 1.0     | 0.989 | 0.8   | 0.100 | 0.8   | 0.394 | 0.8   | 0.382 | 1.0   | 0.233 |       |       |       |
| Panthenic acid                       | 4.2E-04 | 3.6E-04 | 3.6E-04 | 3.2E-04 | 4.0E-04 | 4.1E-04 | 4.8E-04 | 3.6E-04 | 4.2E-04 | 3.5E-04 | 3.4E-04 | 4.2E-04 | 3.5E-04 | 3.8E-04 | 3.6E-05 | 3.8E-04 | 5.0E-05 | 4.5E-04 | 7.2E-05 | 3.7E-04 | 4.1E-05 | 1.0   | 0.959 | 1.2   | 0.246 | 1.0   | 0.800 | 1.0   | 0.220 | 0.8   | 0.206 |       |       |
| γ-Aminobutyramic acid                | 3.0E-04 | 4.6E-04 | 3.1E-04 | 3.3E-04 | 4.0E-04 | 4.4E-04 | 3.4E-04 | 3.5E-04 | 3.3E-04 | 3.1E-04 | 4.1E-04 | 3.4E-04 | 3.6E-04 | 8.9E-05 | 3.6E-04 | 4.0E-05 | 3.4E-04 | 1.0E-05 | 3.5E-04 | 5.3E-05 | 1.0     | 0.998 | 1.0   | 0.777 | 1.0   | 0.952 | 1.0   | 0.920 | 1.0   | 0.717 |       |       |       |
| Betaine                              | 2.1E-02 | 2.0E-02 | 2.1E-02 | 2.2E-02 | 2.0E-02 | 2.0E-02 | 3.1E-02 | 2.4E-02 | 2.8E-02 | 2.9E-02 | 2.5E-02 | 2.8E-02 | 2.1E-02 | 4.5E-04 | 2.1E-02 | 1.4E-03 | 2.8E-02 | 4.3E-03 | 2.7E-02 | 1.9E-03 | 1.0     | 0.998 | 1.3   | 0.067 | *     | 1.3   | 0.025 | *     | 1.3   | 0.013 | *     | 1.0   | 0.710 |
| Imidazoleacetic acid                 | 3.2E-04 | 2.8E-04 | 3.5E-04 | 2.9E-04 | 3.2E-04 | 3.3E-04 | 3.6E-04 | 4.3E-04 | 4.2E-04 | 4.6E-04 | 2.7E-04 | 3.7E-04 | 3.2E-04 | 3.5E-05 | 3.2E-04 | 2.3E-05 | 4.1E-04 | 3.7E-05 | 3.7E-04 | 9.8E-05 | 1.0     | 0.968 | 1.3   | 0.040 | **    | 1.2   | 0.058 | 1.2   | 0.473 | 0.9   | 0.568 |       |       |
| XC0137                               | 6.6E-03 | 4.7E-03 | 6.4E-03 | 5.4E-03 | 4.8E-03 | 4.8E-03 | 5.5E-03 | 5.2E-03 | 5.5E-03 | 4.9E-03 | 5.9E-03 | 5.4E-04 | 5.0E-03 | 4.9E-04 | 5.4E-03 | 1.7E-04 | 5.4E-03 | 3.9E-03 | 1.9E-03 | 1.0     | 0.846   | 1.1   | 0.329 | 0.6   | 0.599 | 0.6   | 0.068 | 0.6   | 0.068 | 0.6   | 0.068 |       |       |
| Tyr                                  | 1.2E-02 | 1.4E-02 | 1.5E-02 | 1.3E-02 | 1.4E-02 | 1.3E-02 | 1.4E-02 | 1.2E-02 | 1.7E-02 | 1.4E-02 | 1.9E-02 | 1.4E-02 | 1.5E-02 | 1.4E-02 | 1.5E-02 | 1.4E-02 | 1.5E-02 | 1.4E-02 | 1.3E-02 | 1.7E-02 | 2.2E-03 | 1.0   | 0.923 | 1.0   | 0.766 | 1.2   | 0.160 | 1.2   | 0.160 | 1.2   | 0.287 |       |       |
| Diphylline                           | 5.8E-03 | 6.6E-03 | 8.6E-03 | 6.6E-03 | 6.4E-03 | 7.7E-03 | 8.0E-03 | 6.6E-03 | 6.9E-03 | 5.4E-03 | 6.1E-03 | 7.0E-03 | 1.4E-03 | 6.9E-03 | 7.0E-04 | 6.7E-03 | 1.2E-03 | 6.1E-03 | 7.3E-04 | 1.0     | 0.949   | 1.0   | 0.799 | 0.9   | 0.408 | 0.9   | 0.234 | 0.9   | 0.511 |       |       |       |       |
| NAD <sup>+</sup>                     | 2.1E-02 | 1.8E-02 | 1.6E-02 | 1.8E-02 | 1.7E-02 | 1.9E-02 | 1.6E-02 | 1.6E-02 | 1.7E-02 | 1.6E-02 | 1.4E-02 | 1.8E-02 | 2.9E-02 | 1.8E-02 | 1.3E-02 | 1.8E-02 | 1.3E-02 | 1.7E-02 | 1.5E-02 | 1.6E-03 | 1.0     | 0.933 | 1.0   | 0.772 | 0.8   | 0.216 | 0.8   | 0.080 | 0.9   | 0.150 |       |       |       |
| Gly                                  | 1.5E-01 | 1.5E-01 | 1.7E-01 | 1.5E-01 | 1.5E-01 | 1.7E-01 | 1.7E-01 | 1.3E-01 | 1.7E-01 | 1.6E-01 | 1.5E-01 | 1.4E-01 | 1.6E-01 | 8.9E-03 | 1.5E-01 | 1.4E-02 | 1.6E-01 | 2.4E-02 | 1.5E-01 | 1.2E-02 | 1.0     | 0.858 | 1.0   | 0.854 | 1.0   | 0.625 | 1.0   | 0.811 | 1.0   | 0.658 |       |       |       |
| γ-oxo-γ-butyro-β-methylcrotonic acid | 2.3E-04 | 2.3E-04 | 2.4E-04 | 2.3E-04 | 2.5E-04 | 2.1E-04 | 2.1E-04 | 2.6E-04 | 2.7E-04 | 2.6E-04 | 2.8E-04 | 2.4E-04 | 2.3E-04 | 2.4E-04 | 1.9E-05 | 2.8E-04 | 1.5E-05 | 2.6E-04 | 2.1E-05 | 1.0     | 0.745   | 1.0   | 0.474 | *     | 1.1   | 0.159 | 1.1   | 0.140 | 0.9   | 0.383 |       |       |       |
| Taurine                              | 1.5E-01 | 1.6E-01 | 1.6E-01 | 1.5E-01 | 1.6E-01 | 1.5E-01 | 1.8E-01 | 1.6E-01 | 1.4E-01 | 1.1E-01 | 1.5E-01 | 1.4E-01 | 1.6E-01 | 2.8E-03 | 1.5E-01 | 8.0E-03 | 1.6E-01 | 1.8E-02 | 1.3E-01 | 1.7E-02 | 1.0     | 0.594 | 1.0   | 1.000 | 0.8   | 0.128 | 0.9   | 0.149 | 0.8   | 0.129 |       |       |       |
| Lys                                  | 7.6E-02 | 1.1E-01 | 1.0E-01 | 8.2E-02 | 1.1E-01 | 9.1E-02 | 1.3E-01 | 1.1E-01 | 1.4E-01 | 1.1E-01 | 1.0E-01 | 1.4E-01 | 1.1E-01 | 1.4E-01 | 1.1E-01 | 1.4E-01 | 1.1E-01 | 1.6E-02 | 1.2E-01 | 1.7E-02 | 1.0     | 0.881 | 1.3   | 0.117 | 1.2   | 0.229 | 1.2   | 0.149 | 0.9   | 0.591 |       |       |       |
| Putrescine                           | 2.7E-04 | 4.2E-04 | 8.6E-04 | 5.4E-04 | 6.7E-04 | 3.0E-04 | 1.5E-03 | 1.2E-03 | 1.6E-03 | 1.8E-03 | 1.5E-03 | 1.0E-03 | 5.2E-04 | 3.1E-04 | 5.0E-04 | 1.8E-04 | 1.5E-03 | 2.3E-04 | 1.5E-03 | 4.2E-04 | 1.0     | 0.954 | 2.8   | 0.016 | *     | 2.8   | 0.039 | *     | 2.9   | 0.042 | *     | 1.0   | 0.984 |
| Lutamic acid                         | 1.9E-03 | 2.0E-03 | 2.1E-03 | 2.1E-03 | 1.9E-03 | 1.9E-03 | 2.0E-03 | 1.9E-03 | 1.7E-03 | 2.0E-03 | 1.8E-03 | 1.4E-03 | 1.1E-04 | 2.0E-03 | 1.1E-04 | 2.0E-03 | 1.4E-03 | 2.0E-04 | 1.9E-03 | 2.0E-04 | 1.0     | 0.924 | 0.9   | 0.388 | 0.9   | 0.262 | 0.9   | 0.358 | 0.9   | 0.571 |       |       |       |
| XC0138                               | 1.4E-03 | 1.3E-03 | 9.3E-04 | 1.2E-03 | 1.0E-03 | 1.3E-03 | 1.6E-03 | 1.5E-03 | 1.8E-03 | 1.4E-03 | 2.6E-03 | 1.2E-03 | 1.6E-03 | 1.2E-03 | 1.6E-03 | 1.5E-03 | 8.0E-05 | 1.9E-03 | 6.2E-04 | 1.0     | 0.846   | 1.6   | 0.154 | 1.6   | 0.174 | 1.6   | 0.174 | 1.6   | 0.174 | 1.6   | 0.386 |       |       |
| 5-Hydroxylsine                       | 7.0E-05 | 7.7E-05 | 8.8E-05 | 7.7E-05 | 8.4E-05 | 6.6E-05 | 1.4E-04 | 1.2E-04 | 1.3E-04 | 1.0E-04 | 9.1E-05 | 1.2E-04 | 7.8E-05 | 9.0E-06 | 7.8E-05 | 8.8E-06 | 1.3E-04 | 8.7E-06 | 1.1E-0  |         |         |       |       |       |       |       |       |       |       |       |       |       |       |

|                                |         |         |         |         |         |         |         |         |         |         |         |         |         |         |         |         |         |         |         |         |       |         |       |       |       |       |       |       |       |       |       |       |       |
|--------------------------------|---------|---------|---------|---------|---------|---------|---------|---------|---------|---------|---------|---------|---------|---------|---------|---------|---------|---------|---------|---------|-------|---------|-------|-------|-------|-------|-------|-------|-------|-------|-------|-------|-------|
| Uracil                         | 5.3E-04 | 6.4E-04 | 8.5E-04 | 5.8E-04 | 6.1E-04 | 5.8E-04 | 5.8E-04 | 8.0E-04 | 6.5E-04 | 5.5E-04 | 7.1E-04 | 7.1E-04 | 6.7E-04 | 1.6E-04 | 5.9E-04 | 1.8E-05 | 6.8E-04 | 1.1E-04 | 6.6E-04 | 9.5E-05 | 0.9   | 0.466   | 1.0   | 0.969 | 1.0   | 0.874 | 1.1   | 0.349 | 1.0   | 0.798 |       |       |       |
| Ethanolamine ribosides         | 8.3E-03 | 8.1E-03 | 7.9E-03 | 7.1E-03 | 7.1E-03 | 7.0E-03 | 7.8E-03 | 8.3E-03 | 6.2E-03 | 6.6E-03 | 6.6E-03 | 6.6E-03 | 8.1E-03 | 2.3E-04 | 7.1E-03 | 6.1E-05 | 7.4E-03 | 1.1E-03 | 6.4E-03 | 3.3E-04 | 0.9   | 0.011   | 0.9   | 0.381 | 0.8   | 0.003 | **    | 0.9   | 0.072 | 0.9   | 0.259 |       |       |
| Argininosuccinic acid          | 1.6E-03 | 2.1E-03 | 2.1E-03 | 1.4E-03 | 2.1E-03 | 1.6E-03 | 1.4E-03 | 1.8E-03 | 1.6E-03 | 1.9E-03 | 1.4E-03 | 1.6E-03 | 2.0E-03 | 2.8E-04 | 1.7E-03 | 3.4E-04 | 1.8E-03 | 3.5E-04 | 1.7E-03 | 2.4E-04 | 0.9   | 0.380   | 0.9   | 0.525 | **    | 0.9   | 0.303 | 1.0   | 0.975 | 1.0   | 0.779 |       |       |
| Ala-Ala                        | 1.1E-03 | 1.3E-03 | 1.4E-03 | 1.3E-03 | 1.1E-03 | 9.6E-04 | 1.1E-03 | 7.9E-04 | 7.2E-04 | 7.5E-04 | 7.8E-04 | 9.4E-04 | 1.3E-03 | 1.3E-04 | 1.1E-03 | 1.3E-04 | 8.6E-04 | 1.7E-04 | 8.4E-04 | 1.0E-04 | 0.9   | 0.196   | 0.7   | 0.031 | **    | 0.6   | 0.010 | **    | 0.7   | 0.061 | 1.0   | 0.810 |       |
| N <sup>1</sup> -Acetyllysine   | 4.9E-04 | 5.5E-04 | 4.5E-04 | 4.2E-04 | 4.9E-04 | 4.1E-04 | 6.9E-04 | 6.5E-04 | 5.3E-04 | 6.1E-04 | 4.8E-04 | 6.9E-04 | 5.0E-04 | 4.7E-05 | 4.3E-04 | 2.7E-05 | 5.8E-04 | 4.4E-05 | 6.9E-04 | 1.1E-04 | 0.9   | 0.111   | 1.2   | 0.087 | 1.2   | 0.248 | **    | 1.4   | 0.136 | 1.0   | 0.855 |       |       |
| Biotinone                      | 4.7E-04 | 5.5E-04 | 5.2E-04 | 3.7E-04 | 3.4E-04 | 5.5E-04 | 6.0E-04 | 5.2E-04 | 5.5E-04 | 5.2E-04 | 6.0E-04 | 4.8E-04 | 7.1E-05 | 4.1E-04 | 0.7E-05 | 5.6E-04 | 4.0E-05 | 5.8E-04 | 3.8E-05 | 0.9     | 0.398 | 1.2     | 0.167 | 1.2   | 0.182 | 1.4   | 0.105 | 1.0   | 0.901 | 1.0   | 0.904 |       |       |
| N <sup>5</sup> -Ethylglutamine | 7.9E-04 | 7.4E-04 | 6.1E-04 | 6.0E-04 | 6.5E-04 | 6.0E-04 | 8.5E-04 | 9.1E-04 | 8.3E-04 | 8.0E-04 | 7.1E-04 | 8.0E-04 | 7.2E-04 | 9.2E-05 | 6.2E-04 | 2.5E-05 | 8.7E-04 | 4.2E-05 | 7.7E-04 | 5.0E-05 | 0.9   | 0.194   | 1.2   | 0.087 | 1.1   | 0.448 | 1.2   | 0.019 | **    | 0.9   | 0.063 |       |       |
| Cystathionine                  | 7.6E-03 | 1.0E-02 | 7.2E-03 | 6.4E-03 | 8.9E-03 | 6.1E-03 | 1.6E-02 | 1.1E-02 | 1.6E-02 | 8.3E-03 | 1.6E-02 | 7.2E-03 | 1.5E-02 | 1.4E-02 | 3.9E-03 | 1.4E-02 | 1.4E-02 | 2.8E-03 | 0.9     | 0.414   | 1.7   | 0.099   | 1.6   | 0.058 | 1.9   | 0.036 | **    | 0.9   | 0.807 | 1.0   | 0.807 |       |       |
| Ergothioneine                  | 4.8E-02 | 5.1E-02 | 4.8E-02 | 2.8E-02 | 4.6E-02 | 5.3E-02 | 4.1E-02 | 3.0E-02 | 3.8E-02 | 4.0E-02 | 3.6E-02 | 3.9E-02 | 4.9E-02 | 2.0E-03 | 4.2E-02 | 1.3E-02 | 3.6E-02 | 5.4E-03 | 3.8E-02 | 2.5E-03 | 0.9   | 0.448   | 0.7   | 0.043 | **    | 0.8   | 0.005 | **    | 0.9   | 0.688 | 1.1   | 0.588 |       |
| Citrulline                     | 9.8E-03 | 1.4E-02 | 1.7E-02 | 1.1E-02 | 1.3E-02 | 1.2E-02 | 1.4E-02 | 1.0E-02 | 1.2E-02 | 1.1E-02 | 1.1E-02 | 1.5E-02 | 1.4E-02 | 3.7E-03 | 1.2E-02 | 9.8E-02 | 1.0E-02 | 2.7E-03 | 0.9     | 0.466   | 0.9   | 0.522   | 0.9   | 0.617 | 1.0   | 0.788 | 1.0   | 0.788 | 1.0   | 0.879 | 1.0   | 0.879 |       |
| Stachydine                     | 3.6E-02 | 3.4E-02 | 3.1E-02 | 3.5E-02 | 2.5E-02 | 2.7E-02 | 4.0E-02 | 3.8E-02 | 3.5E-02 | 3.5E-02 | 3.2E-02 | 3.7E-02 | 3.4E-02 | 2.7E-03 | 2.9E-02 | 5.3E-03 | 3.8E-02 | 2.5E-03 | 3.4E-02 | 2.5E-03 | 0.9   | 0.233   | 1.1   | 0.160 | 1.0   | 0.854 | 1.2   | 0.205 | 0.9   | 0.189 | 1.0   | 0.189 |       |
| Gly-Gly                        | 4.4E-04 | 4.8E-04 | 3.1E-04 | 3.9E-04 | 4.1E-04 | 4.2E-04 | 4.1E-04 | 3.4E-04 | 3.8E-04 | 4.4E-04 | 4.4E-04 | 5.2E-04 | 4.7E-04 | 3.6E-05 | 4.0E-04 | 1.6E-05 | 3.8E-04 | 3.1E-05 | 4.5E-04 | 6.2E-05 | 0.8   | 0.058   | 0.8   | 0.024 | **    | 0.6   | 0.025 | 1.1   | 0.302 | 1.2   | 0.156 |       |       |
| β-hydroxyisovalinate           | 3.0E-03 | 3.4E-03 | 2.7E-03 | 2.8E-03 | 2.5E-03 | 2.4E-03 | 2.3E-03 | 2.7E-03 | 2.0E-03 | 2.1E-03 | 1.9E-03 | 4.2E-03 | 3.0E-03 | 3.3E-04 | 2.6E-03 | 2.2E-04 | 2.4E-03 | 3.6E-04 | 2.7E-03 | 1.3E-03 | 0.8   | 0.130   | 0.8   | 0.083 | 0.9   | 0.733 | 1.1   | 0.852 | 1.2   | 0.685 | 1.0   | 0.685 |       |
| Adenine                        | 1.2E-03 | 1.9E-03 | 1.3E-03 | 1.6E-03 | 1.0E-03 | 1.1E-03 | 1.0E-03 | 1.7E-03 | 1.2E-03 | 1.3E-03 | 1.3E-03 | 2.1E-03 | 1.5E-03 | 3.8E-04 | 1.2E-03 | 2.9E-04 | 1.3E-03 | 3.5E-04 | 1.6E-03 | 4.7E-04 | 0.8   | 0.462   | 0.9   | 0.639 | 1.1   | 0.748 | 1.3   | 0.351 | 1.2   | 0.471 | 1.0   | 0.471 |       |
| Quantoacetic acid              | 2.5E-03 | 2.2E-03 | 1.8E-03 | 1.7E-03 | 2.2E-03 | 1.5E-03 | 2.3E-03 | 2.7E-03 | 1.9E-03 | 2.0E-03 | 2.1E-03 | 2.9E-03 | 2.2E-03 | 3.2E-04 | 1.9E-03 | 3.4E-04 | 2.3E-03 | 4.0E-04 | 2.3E-03 | 5.0E-04 | 0.8   | 0.260   | 1.1   | 0.668 | 1.1   | 0.668 | 1.3   | 0.231 | 1.0   | 0.970 | 1.0   | 0.970 |       |
| 3-Methylhistidine              | 2.9E-03 | 2.8E-03 | 2.8E-03 | 2.4E-03 | 2.4E-03 | 2.3E-03 | 3.8E-03 | 3.5E-03 | 3.7E-03 | 3.1E-03 | 1.9E-03 | 3.3E-03 | 2.8E-03 | 6.1E-05 | 2.4E-03 | 5.7E-05 | 3.7E-03 | 1.5E-04 | 2.8E-03 | 7.4E-04 | 0.8   | 6.5E-04 | **    | 1.3   | 0.004 | **    | 1.0   | 0.923 | 1.2   | 0.428 | 0.7   | 0.158 |       |
| N-Methylalanine                | 2.0E-04 | 2.2E-04 | N.D.    | 1.8E-04 | 1.6E-04 | 1.6E-04 | 2.7E-04 | 2.6E-04 | 2.5E-04 | 2.9E-04 | 2.2E-04 | 2.3E-04 | 2.1E-04 | 1.5E-05 | 1.7E-04 | 8.9E-06 | 2.6E-04 | 6.2E-06 | 2.4E-04 | 4.5E-05 | 0.8   | 0.139   | 1.3   | 0.094 | **    | 1.0   | 0.228 | 1.4   | 0.103 | 0.9   | 0.610 |       |       |
| Pro                            | 8.5E-02 | 9.8E-02 | 7.9E-02 | 6.7E-02 | 8.3E-02 | 9.6E-02 | 1.1E-01 | 9.0E-02 | 1.1E-01 | 1.0E-01 | 8.2E-02 | 1.2E-01 | 8.8E-02 | 9.8E-03 | 7.3E-02 | 8.4E-03 | 1.0E-01 | 1.2E-02 | 1.0E-01 | 1.6E-02 | 0.8   | 0.123   | 1.2   | 0.139 | 1.1   | 0.345 | 1.4   | 0.086 | 1.0   | 0.704 | 1.0   | 0.704 |       |
| Val                            | 1.1E-01 | 1.1E-01 | 1.1E-01 | 8.6E-02 | 9.1E-02 | 9.6E-02 | 1.4E-01 | 1.2E-01 | 1.3E-01 | 1.1E-01 | 9.5E-02 | 1.2E-01 | 1.1E-01 | 1.7E-03 | 9.1E-02 | 5.3E-03 | 1.3E-01 | 1.3E-02 | 1.1E-01 | 1.3E-02 | 0.8   | 0.018   | **    | 1.2   | 0.117 | 1.0   | 0.859 | 1.2   | 0.142 | 0.8   | 0.122 | 1.0   | 0.122 |
| β-Ala-Lys                      | 5.4E-04 | 7.2E-04 | 8.7E-04 | 6.7E-04 | 5.6E-04 | 5.3E-04 | 6.4E-04 | 4.3E-04 | 4.9E-04 | 5.5E-04 | 6.6E-04 | 6.5E-04 | 7.1E-04 | 1.7E-04 | 5.9E-04 | 7.1E-05 | 6.2E-04 | 1.1E-04 | 5.9E-04 | 5.5E-05 | 0.8   | 0.330   | 0.7   | 0.187 | 1.0   | 0.824 | 1.0   | 0.983 | 1.1   | 0.432 | 1.0   | 0.432 |       |
| Succinic acid                  | 8.0E-02 | 8.5E-02 | 8.5E-02 | 6.5E-02 | 5.7E-02 | 6.8E-02 | 8.8E-02 | 7.5E-02 | 9.1E-02 | 7.9E-02 | 8.2E-02 | 7.7E-02 | 1.1E-02 | 6.3E-02 | 5.9E-03 | 8.1E-02 | 6.6E-03 | 8.4E-02 | 6.1E-03 | 0.8     | 0.141 | 1.1     | 0.577 | 1.1   | 0.383 | 1.3   | 0.013 | *     | 1.0   | 0.634 | 1.0   | 0.634 |       |
| 3-Aminobutyric acid            | 1.2E-03 | 7.6E-04 | 6.7E-04 | 7.5E-04 | 6.7E-04 | 7.2E-04 | 1.0E-03 | 8.4E-04 | 8.0E-04 | 8.4E-04 | 8.6E-04 | 9.8E-04 | 8.7E-04 | 2.7E-04 | 7.1E-04 | 4.2E-05 | 9.2E-04 | 9.7E-05 | 8.3E-04 | 1.5E-04 | 0.8   | 0.422   | 1.1   | 0.777 | 1.0   | 0.844 | 1.2   | 0.305 | 0.9   | 0.439 | 1.0   | 0.439 |       |
| Carboxymethylsulfonamide       | 9.5E-05 | 8.3E-05 | 1.3E-04 | 6.0E-05 | 5.9E-05 | 1.0E-04 | 9.1E-05 | 1.1E-04 | 1.0E-04 | 1.0E-04 | 8.2E-05 | 1.1E-04 | 1.0E-04 | 2.2E-05 | 8.1E-05 | 2.1E-05 | 1.0E-04 | 7.8E-06 | 1.0E-04 | 1.6E-05 | 0.8   | 0.337   | 1.0   | 0.937 | 1.0   | 0.929 | 1.2   | 0.322 | 1.0   | 0.976 | 1.0   | 0.976 |       |
| Homoserine                     | 5.2E-04 | 6.3E-04 | 4.5E-04 | 4.2E-04 | 4.7E-04 | 4.1E-04 | 7.2E-04 | 6.0E-04 | 6.4E-04 | 6.5E-04 | 6.4E-04 | 6.5E-04 | 5.3E-04 | 9.2E-05 | 4.3E-04 | 3.1E-05 | 6.5E-04 | 6.0E-05 | 5.9E-04 | 8.8E-05 | 0.8   | 0.193   | 1.2   | 0.139 | 1.1   | 0.446 | 1.4   | 0.073 | 0.9   | 0.396 | 1.0   | 0.396 |       |
| Pyridoxal                      | 1.7E-04 | 2.2E-04 | 1.7E-04 | 1.6E-04 | 1.9E-04 | 1.6E-04 | 1.9E-04 | 2.1E-04 | 1.4E-04 | 1.5E-04 | 1.6E-04 | 1.9E-04 | 1.3E-04 | 4.7E-05 | 1.3E-04 | 1.7E-05 | 1.5E-04 | 3.5E-05 | 1.9E-04 | 1.7E-05 | 0.8   | 0.162   | 0.9   | 0.589 | 1.1   | 0.296 | 1.1   | 0.546 | 0.9   | 0.688 | 1.0   | 0.688 |       |
| Hypoxanthine                   | 4.6E-03 | 3.7E-03 | 3.5E-03 | 3.3E-03 | 2.8E-03 | 2.8E-03 | 4.9E-03 | 5.3E-03 | 5.9E-03 | 5.3E-03 | 5.1E-03 | 3.9E-03 | 5.8E-03 | 3.2E-03 | 3.3E-03 | 5.3E-03 | 4.5E-04 | 5.0E-03 | 1.0E-03 | 0.8     | 0.146 | 1.4     | 0.033 | *     | 1.3   | 0.213 | 1.6   | 0.080 | 0.9   | 0.618 | 1.0   | 0.618 |       |
| Sarcosine                      | 4.1E-02 | 3.8E-02 | 3.2E-02 | 3.2E-02 | 3.0E-02 | 2.8E-02 | 4.2E-02 | 4.0E-02 | 4.0E-02 | 4.0E-02 | 4.0E-02 | 3.9E-02 | 4.7E-02 | 3.7E-02 | 5.0E-03 | 3.0E-02 | 2.3E-03 | 4.1E-02 | 1.4E-03 | 4.2E-02 | 0.8   | 0.119   | 1.1   | 0.357 | 1.1   | 0.276 | 1.4   | 0.030 | **    | 1.0   | 0.629 | 1.0   | 0.629 |
| N-Acetyllysine                 | 2.2E-03 | 2.2E-03 | 2.5E-03 | 1.8E-03 | 1.9E-03 | 1.8E-03 | 2.0E-03 | 2.2E-03 | 1.7E-03 | 1.7E-03 | 2.4E-03 | 2.3E-03 | 1.4E-04 | 1.9E-03 | 5.7E-03 | 2.1E-03 | 8.5E-05 | 1.9E-03 | 3.7E-04 | 0.8     | 0.021 | **      | 1.0   | 0.236 | 1.1   | 0.704 | 0.9   | 0.503 | 1.0   | 0.503 | 1.0   | 0.503 |       |
| β-Ala                          | 2.4E-02 | 2.5E-02 | 2.0E-02 | 1.8E-02 | 2.0E-02 | 1.8E-02 | 2.5E-02 | 2.4E-02 | 2.6E-02 | 2.6E-02 | 2.3E-02 | 2.7E-02 | 1.8E-02 | 9.8E-04 | 2.4E-02 | 2.8E-03 | 2.2E-02 | 5.0E-03 | 0.8     | 0.086   | 1.0   | 0.809   | 1.0   | 0.781 | 1.2   | 0.352 | 0.9   | 0.667 | 1.0   | 0.667 | 1.0   | 0.667 |       |
| Cystine glutathione disulfide  | 1.3E-04 | 2.1E-04 | 1.7E-04 | 1.6E-04 | 1.3E-04 | 1.2E-04 | 1.4E-04 | 1.4E-04 | 1.4E-04 | 1.4E-04 | 1.4E-04 | 1.4E-04 | 1.4E-04 | 1.4E-04 | 1.4E-04 | 1.4E-04 | 1.4E-04 | 1.4E-04 | 1.4E-04 | 1.4E-04 | 0.8   | 0.287   | 0.9   | 0.735 | 1.5   | 0.287 | 1.8   | 0.170 | 1.6   | 0.240 | 1.0   | 0.240 |       |
| N,N-Dimethylglycine            | 2.6E-02 | 2.1E-02 | 2.0E-02 | 2.0E-02 | 1.7E-02 | 1.7E-02 | 2.2E-02 | 2.3E-02 | 2.3E-02 | 2.4E-02 | 2.4E-02 | 2.2E-02 | 3.4E-03 | 1.8E-02 | 1.5E-03 | 2.2E-02 | 6.6E-04 | 2.4E-02 | 1.7E-04 | 0.8     | 0.137 | 1.0     | 0.961 | 1.1   | 0.469 | 1.4   | 0.018 | *     | 1.1   | 0.042 | 1.0   | 0.042 |       |
| N-Acetylglycamic acid          | 7.8E-03 | 9.3E-03 | 6.3E-03 | 6.7E-03 | 6.7E-03 | 6.7E-03 | 9.3E-03 | 8.3E-03 | 7.2E-03 | 9.3E-03 | 8.3E-03 | 7.0E-03 | 8.4E-03 | 1.5E-03 | 6.2E-03 |         |         |         |         |         |       |         |       |       |       |       |       |       |       |       |       |       |       |

|                                  |         |         |         |         |         |         |         |         |         |         |         |         |         |         |         |         |         |         |         |         |      |       |     |      |       |      |       |       |       |       |       |       |       |   |
|----------------------------------|---------|---------|---------|---------|---------|---------|---------|---------|---------|---------|---------|---------|---------|---------|---------|---------|---------|---------|---------|---------|------|-------|-----|------|-------|------|-------|-------|-------|-------|-------|-------|-------|---|
| Methionine sulfoxide             | 1.6E-03 | 2.2E-03 | 1.7E-03 | 1.1E-03 | 1.1E-03 | 9.2E-04 | 3.3E-03 | 3.1E-03 | 2.8E-03 | 2.3E-03 | 2.2E-03 | 2.9E-03 | 1.8E-03 | 3.1E-04 | 1.0E-03 | 9.9E-05 | 3.1E-03 | 2.2E-04 | 2.4E-03 | 3.8E-04 | 0.6  | 0.037 | *   | 1.7  | 0.007 | **   | 1.3   | 0.107 | 2.4   | 0.018 | *     | 0.8   | 0.085 |   |
| Butyrylcarnitine                 | 1.1E-02 | 1.1E-02 | 7.1E-03 | 7.7E-03 | 3.1E-03 | 5.0E-03 | 4.0E-02 | 2.0E-02 | 5.4E-03 | 1.7E-02 | 1.4E-02 | 1.9E-02 | 9.6E-03 | 2.2E-03 | 5.3E-03 | 2.3E-03 | 2.2E-02 | 1.7E-02 | 1.7E-02 | 2.3E-03 | 0.6  | 0.079 |     | 2.3  | 0.353 | 1.7  | 0.020 | *     | 3.1   | 0.004 | **    | 0.8   | 0.661 |   |
| Glutamic acid                    | 1.3E-03 | 1.1E-03 | 6.1E-04 | N.D.    | N.D.    | 5.3E-04 | 1.9E-03 | 1.3E-03 | 8.7E-04 | 1.2E-03 | 1.0E-03 | 1.4E-03 | 1.0E-03 | 3.7E-04 | 5.3E-04 | N.A.    | 1.4E-03 | 5.3E-04 | 1.2E-03 | 2.1E-04 | 0.5  | N.A.  |     | 1.3  | 0.423 | 1.2  | 0.446 | 2.3   | N.A.  |       | 0.9   | 0.731 |       |   |
| <sup>15</sup> N-acetylmethionine | 1.2E-03 | 1.6E-03 | 8.4E-04 | 9.0E-04 | 4.2E-04 | 5.7E-04 | 4.0E-03 | 1.9E-03 | 4.6E-04 | 1.6E-03 | 1.7E-03 | 1.8E-03 | 1.2E-03 | 4.0E-04 | 6.3E-04 | 2.4E-04 | 2.1E-03 | 1.8E-03 | 1.7E-03 | 9.4E-05 | 0.5  | 0.104 |     | 1.7  | 0.462 | 1.4  | 0.172 | 2.7   | 0.009 | **    | 0.8   | 0.723 |       |   |
| Glucuronic acid                  | 4.5E-03 | 6.3E-03 | 5.1E-03 | 2.8E-03 | 1.9E-03 | 3.4E-03 | 6.7E-03 | 6.3E-03 | 6.9E-03 | 4.7E-03 | 4.9E-03 | 4.2E-03 | 5.3E-03 | 9.3E-04 | 2.8E-03 | 8.9E-04 | 6.7E-03 | 3.1E-04 | 4.6E-03 | 3.5E-04 | 0.5  | 0.021 | *   | 1.3  | 0.116 | 0.9  | 0.329 | 1.8   | 0.043 | *     | 0.7   | 0.002 | **    |   |
| Isovalerylcarnitine              | 3.4E-03 | 3.1E-03 | 2.5E-03 | 1.9E-03 | 7.9E-04 | 1.5E-03 | 4.2E-03 | 4.1E-03 | 2.7E-03 | 3.7E-03 | 3.3E-03 | 4.4E-03 | 3.0E-03 | 4.5E-04 | 1.4E-03 | 5.6E-04 | 3.7E-03 | 8.3E-04 | 3.8E-03 | 5.6E-04 | 0.5  | 0.020 | *   | 1.2  | 0.287 | 1.3  | 0.124 | 2.7   | 0.006 | **    | 1.0   | 0.859 |       |   |
| Penicillamine                    | 3.0E-04 | 3.4E-04 | 2.5E-04 | N.D.    | 1.3E-04 | N.D.    | 4.2E-04 | 3.9E-04 | 3.8E-04 | 2.9E-04 | 3.4E-04 | 4.3E-04 | 2.9E-04 | 4.2E-05 | 1.3E-04 | N.A.    | 4.0E-04 | 2.0E-05 | 3.5E-04 | 7.1E-05 | 0.4  | N.A.  |     | 1.3  | 0.036 | *    | 1.2   | 0.291 | 2.7   | N.A.  |       | 0.9   | 0.420 |   |
| UDP-glucuronic acid              | 7.2E-04 | 9.2E-04 | 7.7E-04 | 3.0E-04 | 3.1E-04 | 4.0E-04 | 2.3E-03 | 1.5E-03 | 1.7E-03 | 5.1E-04 | 4.8E-04 | 2.3E-04 | 8.0E-04 | 1.0E-04 | 3.4E-04 | 5.3E-05 | 1.8E-03 | 3.9E-04 | 4.1E-04 | 1.5E-04 | 0.4  | 0.006 | **  | 2.3  | 0.037 | *    | 0.5   | 0.025 | *     | 1.2   | 0.523 | 0.2   | 0.014 | * |
| Octanoylcarnitine                | 3.5E-04 | 4.9E-04 | 2.6E-04 | 2.0E-04 | 1.0E-04 | 1.5E-04 | 1.8E-03 | 5.9E-04 | 1.2E-04 | 6.1E-04 | 4.7E-04 | 6.9E-04 | 3.7E-04 | 1.2E-04 | 1.5E-04 | 4.8E-05 | 8.5E-04 | 8.9E-04 | 5.9E-04 | 1.1E-04 | 0.4  | 0.070 |     | 2.3  | 0.445 | 1.6  | 0.074 | 3.9   | 0.009 | **    | 0.7   | 0.661 |       |   |
| Hexanoic acid                    | N.D.    | 6.1E-04 | N.D.    | N.D.    | N.D.    | N.D.    | 1.2E-03 | 6.5E-04 | N.D.    | 4.8E-04 | N.D.    | 7.1E-04 | 6.1E-04 | N.A.    | N.D.    | N.A.    | 9.4E-04 | 4.1E-04 | 6.0E-04 | 1.7E-04 | <1   | N.A.  |     | 1.5  | N.A.  | 1.0  | N.A.  | 1<    | N.A.  |       | 0.6   | 0.438 |       |   |
| Octanoic acid                    | N.D.    | 4.0E-04 | N.D.    | N.D.    | N.D.    | N.D.    | 6.8E-04 | 3.8E-04 | N.D.    | N.D.    | 3.6E-04 | 4.8E-04 | 4.0E-04 | N.A.    | N.D.    | N.A.    | 5.3E-04 | 2.1E-04 | 4.2E-04 | 8.8E-05 | <1   | N.A.  |     | 1.3  | N.A.  | 1.0  | N.A.  | 1<    | N.A.  |       | 0.8   | 0.604 |       |   |
| Methylguanidine                  | 4.2E-04 | 5.2E-04 | N.D.    | N.D.    | N.D.    | N.D.    | N.D.    | 4.0E-04 | 5.0E-04 | 4.6E-04 | N.D.    | 5.1E-04 | 4.7E-04 | 7.5E-05 | N.D.    | N.A.    | 4.5E-04 | 7.3E-05 | 4.9E-04 | 3.1E-05 | <1   | N.A.  |     | 1.0  | 0.832 | 1.0  | 0.810 | 1<    | N.A.  |       | 1.1   | 0.626 |       |   |
| <sup>15</sup> N-methylguanidine  | 1.0E-04 | 8.1E-05 | N.D.    | N.D.    | N.D.    | N.D.    | N.D.    | 9.1E-05 | 8.5E-05 | 8.9E-05 | 8.8E-05 | 9.4E-05 | 9.3E-05 | 1.7E-05 | N.D.    | N.A.    | 8.8E-05 | 4.0E-06 | 9.1E-05 | 3.3E-06 | <1   | N.A.  |     | 1.0  | 0.779 | 1.0  | 0.893 | 1<    | N.A.  |       | 1.0   | 0.577 |       |   |
| Ethyl glucuronide                | N.D.    | 7.3E-04 | N.D.    | N.D.    | N.D.    | N.D.    | 3.9E-04 | N.D.    | 9.3E-04 | N.D.    | N.D.    | 4.7E-04 | 7.3E-04 | N.A.    | N.D.    | N.A.    | 6.6E-04 | 3.8E-04 | 4.7E-04 | N.A.    | <1   | N.A.  |     | 0.9  | N.A.  | 0.7  | N.A.  | 1<    | N.A.  |       | 0.7   | N.A.  |       |   |
| 3-Amino-2-piperidone             | N.D.    | 2.0E-04 | N.D.    | N.D.    | N.D.    | N.D.    | N.D.    | 1.5E-04 | N.D.    | N.D.    | 2.8E-04 | 2.0E-04 | N.A.    | N.D.    | N.A.    | 1.5E-04 | N.A.    | 2.8E-04 | N.A.    | <1      | N.A. |       | 0.7 | N.A. | 1.4   | N.A. | 1<    | N.A.  |       | 1.9   | N.A.  |       |       |   |
| <i>N</i> -Methylproline          | N.D.    | N.D.    | N.D.    | N.D.    | N.D.    | N.D.    | 2.4E-04 | 2.0E-04 | 2.0E-04 | 2.1E-04 | 1.7E-04 | 2.5E-04 | N.D.    | N.A.    | N.D.    | N.A.    | 2.1E-04 | 2.1E-05 | 2.1E-04 | 3.9E-05 | N.A. | N.A.  |     | 1<   | N.A.  | 1<   | N.A.  | 1<    | N.A.  |       | 1.0   | 0.929 |       |   |
| Isobutyric acid                  | N.D.    | N.D.    | N.D.    | N.D.    | N.D.    | N.D.    | 7.4E-04 | 5.8E-04 | N.D.    | 4.4E-04 | N.D.    | N.D.    | N.D.    | N.A.    | N.D.    | N.A.    | 6.6E-04 | 1.1E-04 | 4.4E-04 | N.A.    | N.A. | N.A.  | 1<  | N.A. | 1<    | N.A. | 1<    | N.A.  |       | 0.7   | N.A.  |       |       |   |
| <i>S</i> -Methylmethionine       | N.D.    | N.D.    | N.D.    | N.D.    | N.D.    | N.D.    | N.D.    | N.D.    | 5.2E-05 | 4.9E-05 | 5.7E-05 | N.D.    | N.A.    | N.D.    | N.A.    | N.D.    | N.A.    | 5.2E-05 | 4.3E-06 | N.A.    | N.A. | N.A.  | 1<  | N.A. | 1<    | N.A. | 1<    | N.A.  |       | 1<    | N.A.  |       |       |   |

N.D.: Not Detected.

N.A.: Not Available.

† candidate compound is predicted from HMT database based on m/z and MT of peaks.

¶ in the case of A vs B, the ratio of the average was calculated as A/B.

§ Welch's *t*-test, *p*-value (\*<0.05, \*\*<0.01, \*\*\*<0.001)

The peak signal intensities of Ala and Betaine were saturated and the relative areas of <sup>13</sup>C were used.

Description of XA . . . or XC . . . in compound name indicates unknown peaks, which has been detected in some other organism samples in the HMT database for metabolic identification.
