# Supplementary material for: Chronic Intake of Japanese Sake Mediates Radiation-Induced Metabolic Alterations in Mouse Liver
Source: PubMed Central journal article supplement (PMC4713437; doi:10.1371/journal.pone.0146730), 2016-01-11
Supplement: pone.0146730.s008.pdf [file pone.0146730.s008.pdf]

**S5 Table.Selected metabolites.**

These have significant correlation (P<0.01) based on factor loadings between the PC2 scores and variables in the metabolome data for irradiated mice administered sake.

| Sample No              | 1                    | 2       | 3       | 4       | 5       | 6       | 7       | 8       | 9       | 10      | 11      | 12      |                |         |         |
|------------------------|----------------------|---------|---------|---------|---------|---------|---------|---------|---------|---------|---------|---------|----------------|---------|---------|
| PC2 scores             | -4.64                | -5.89   | -2.02   | -7.94   | 1.44    | 1.48    | -5.19   | -5.08   | -1.51   | 11.88   | 9.03    | 8.45    |                |         |         |
| Metabolites            | Relative area values |         |         |         |         |         |         |         |         |         |         |         | factor loading | p-value |         |
| XA0013                 | N.D.                 | N.D.    | N.D.    | 1.7E-04 | N.D.    | N.D.    | N.D.    | N.D.    | 4.6E-04 | N.D.    | N.D.    | N.D.    | 1.0E+00        | 1.3E-79 |         |
| Cytosine               | N.D.                 | N.D.    | N.D.    | N.D.    | N.D.    | N.D.    | 4.3E-05 | 5.7E-05 | 8.7E-05 | N.D.    | N.D.    | N.D.    | 9.5E-01        | 1.4E-06 |         |
| AMP                    | 1.1E-01              | 1.1E-01 | 1.2E-01 | 9.7E-02 | 1.2E-01 | 1.2E-01 | 1.2E-01 | 1.2E-01 | 1.2E-01 | 1.2E-01 | 1.7E-01 | 1.6E-01 | 1.6E-01        | 9.5E-01 | 2.5E-06 |
| Gly-Gly                | 4.0E-04              | 4.0E-04 | 3.8E-04 | 3.5E-04 | 4.5E-04 | 3.9E-04 | 3.9E-04 | 4.2E-04 | 4.5E-04 | 7.5E-04 | 6.1E-04 | 6.5E-04 | 9.3E-01        | 1.3E-05 |         |
| 3'-Dephospho CoA       | 1.8E-04              | 1.2E-04 | 1.7E-04 | 2.0E-04 | 2.0E-04 | 2.8E-04 | 1.6E-04 | 2.0E-04 | 2.7E-04 | 4.8E-04 | 3.8E-04 | 4.8E-04 | 9.1E-01        | 3.1E-05 |         |
| Cys                    | 1.6E-04              | 1.3E-04 | 1.4E-04 | 2.0E-04 | 2.2E-04 | 2.6E-04 | 1.5E-04 | 2.4E-04 | 2.3E-04 | 4.2E-04 | 4.5E-04 | 4.0E-04 | 9.1E-01        | 4.5E-05 |         |
| Glutathione (GSH)      | 3.8E-01              | 3.4E-01 | 4.5E-01 | 4.5E-01 | 5.0E-01 | 5.1E-01 | 4.0E-01 | 3.9E-01 | 5.0E-01 | 5.8E-01 | 6.4E-01 | 5.5E-01 | 9.0E-01        | 6.7E-05 |         |
| Ala-Ala                | 7.2E-04              | 6.1E-04 | 7.2E-04 | 4.9E-04 | 7.3E-04 | 7.4E-04 | 7.2E-04 | 7.5E-04 | 8.1E-04 | 9.6E-04 | 9.1E-04 | 9.3E-04 | 8.9E-01        | 1.1E-04 |         |
| Nicotinamide           | 6.2E-02              | 6.3E-02 | 7.6E-02 | 7.8E-02 | 8.5E-02 | 7.6E-02 | 7.6E-02 | 8.3E-02 | 6.5E-02 | 1.2E-01 | 1.2E-01 | 1.2E-01 | 8.9E-01        | 1.3E-04 |         |
| Trimethylamine         | 6.2E-04              | 9.1E-04 | 8.6E-04 | 3.6E-04 | 8.2E-04 | 6.6E-04 | 1.5E-03 | 9.6E-04 | 1.3E-03 | 3.0E-03 | 3.5E-03 | 3.3E-03 | 8.6E-01        | 3.3E-04 |         |
| Cysteine glutathione c | 1.6E-04              | 1.4E-04 | 1.3E-04 | 1.3E-04 | 1.8E-04 | 1.5E-04 | 1.7E-04 | 1.9E-04 | 2.1E-04 | 2.9E-04 | 2.5E-04 | 2.5E-04 | 8.5E-01        | 4.5E-04 |         |
| CMP                    | 7.5E-04              | 8.9E-04 | 7.0E-04 | 5.6E-04 | 9.8E-04 | 9.2E-04 | 8.1E-04 | 7.9E-04 | 7.4E-04 | 1.1E-03 | 1.1E-03 | 1.0E-03 | 8.4E-01        | 5.6E-04 |         |
| GMP                    | 9.9E-03              | 8.4E-03 | 9.7E-03 | 6.5E-03 | 9.5E-03 | 8.6E-03 | 9.4E-03 | 1.0E-02 | 1.1E-02 | 1.2E-02 | 1.2E-02 | 1.3E-02 | 8.4E-01        | 6.7E-04 |         |
| Gly                    | 1.2E-01              | 1.1E-01 | 1.2E-01 | 1.2E-01 | 1.5E-01 | 1.5E-01 | 1.1E-01 | 1.3E-01 | 1.2E-01 | 1.6E-01 | 1.4E-01 | 1.4E-01 | 8.3E-01        | 8.1E-04 |         |
| Octanoic acid          | N.D.                 | N.D.    | N.D.    | N.D.    | N.D.    | 1.3E-04 | 3.8E-04 | 5.4E-04 | 4.2E-04 | N.D.    | N.D.    | N.D.    | -8.3E-01       | 9.0E-04 |         |
| 6-Phosphogluconic ac   | 1.7E-03              | 1.8E-03 | 2.0E-03 | 1.7E-03 | 2.0E-03 | 2.2E-03 | 1.3E-03 | 1.7E-03 | 1.6E-03 | 2.2E-03 | 2.4E-03 | 2.1E-03 | 8.2E-01        | 1.1E-03 |         |
| Ascorbic acid          | 1.6E-02              | 2.0E-02 | 2.3E-02 | 2.0E-02 | 2.8E-02 | 3.6E-02 | 1.5E-02 | 1.7E-02 | 2.7E-02 | 3.6E-02 | 3.1E-02 | 2.8E-02 | 8.1E-01        | 1.3E-03 |         |
| CoA_divalent           | 5.5E-03              | 4.2E-03 | 6.2E-03 | 5.9E-03 | 6.1E-03 | 7.6E-03 | 5.1E-03 | 6.3E-03 | 7.1E-03 | 8.0E-03 | 8.0E-03 | 7.3E-03 | 8.1E-01        | 1.4E-03 |         |
| XC0137                 | 5.6E-03              | 5.5E-03 | 6.5E-03 | 5.3E-03 | 5.8E-03 | 5.6E-03 | 5.6E-03 | 5.2E-03 | 6.0E-03 | 2.9E-03 | 3.2E-03 | 3.3E-03 | -8.1E-01       | 1.5E-03 |         |
| XC0016                 | 9.2E-04              | 7.4E-04 | 8.4E-04 | 6.4E-04 | 1.0E-03 | 9.5E-04 | 7.2E-04 | 6.7E-04 | 7.6E-04 | 1.1E-03 | 9.8E-04 | 8.8E-04 | 7.9E-01        | 2.4E-03 |         |
| Sedoheptulose 7-pho    | 7.5E-03              | 5.4E-03 | 5.3E-03 | 4.0E-03 | 3.5E-03 | 3.8E-03 | 6.0E-03 | 6.1E-03 | 6.8E-03 | 2.3E-03 | 2.2E-03 | 2.2E-03 | -7.9E-01       | 2.5E-03 |         |
| Thiamine phosphate     | 8.1E-04              | 7.9E-04 | 8.8E-04 | 6.8E-04 | 8.6E-04 | 1.0E-03 | 6.5E-04 | 5.4E-04 | 7.3E-04 | 9.8E-04 | 9.6E-04 | 1.0E-03 | 7.8E-01        | 2.5E-03 |         |
| S-Methylglutathione    | 1.9E-03              | 1.6E-03 | 1.5E-03 | 1.5E-03 | 2.1E-03 | 1.8E-03 | 1.5E-03 | 1.3E-03 | 2.0E-03 | 2.2E-03 | 2.1E-03 | 2.0E-03 | 7.8E-01        | 2.6E-03 |         |
| Lactic acid            | 4.0E-01              | 4.0E-01 | 4.8E-01 | 4.6E-01 | 5.4E-01 | 5.6E-01 | 4.4E-01 | 4.0E-01 | 4.7E-01 | 5.4E-01 | 5.8E-01 | 5.2E-01 | 7.8E-01        | 2.7E-03 |         |
| UMP                    | 1.9E-02              | 1.9E-02 | 2.0E-02 | 1.1E-02 | 1.7E-02 | 1.5E-02 | 1.9E-02 | 2.0E-02 | 1.9E-02 | 2.5E-02 | 2.5E-02 | 2.6E-02 | 7.7E-01        | 3.6E-03 |         |
| XC0132                 | 5.6E-04              | 5.9E-04 | 6.5E-04 | 5.7E-04 | 6.8E-04 | 6.4E-04 | 5.2E-04 | 5.6E-04 | 5.7E-04 | 6.5E-04 | 6.9E-04 | 6.6E-04 | 7.6E-01        | 4.0E-03 |         |
| Glucose 6-phosphate    | 3.5E-02              | 2.2E-02 | 3.1E-02 | 3.4E-02 | 2.4E-02 | 2.9E-02 | 3.1E-02 | 3.4E-02 | 3.5E-02 | 1.2E-02 | 2.5E-02 | 2.0E-02 | -7.6E-01       | 4.5E-03 |         |
| Ribose 5-phosphate     | 3.1E-03              | 2.9E-03 | 4.3E-03 | 3.4E-03 | 4.2E-03 | 3.6E-03 | 2.4E-03 | 3.1E-03 | 3.4E-03 | 4.5E-03 | 4.2E-03 | 3.9E-03 | 7.6E-01        | 4.5E-03 |         |
| IMP                    | 3.9E-03              | 5.0E-03 | 4.5E-03 | 4.1E-03 | 2.8E-03 | 3.0E-03 | 5.0E-03 | 5.3E-03 | 4.9E-03 | 3.5E-03 | 2.5E-03 | 2.4E-03 | -7.4E-01       | 5.4E-03 |         |
| Glycerol 3-phosphate   | 7.4E-02              | 6.7E-02 | 7.6E-02 | 8.2E-02 | 7.3E-02 | 8.1E-02 | 6.3E-02 | 6.8E-02 | 7.4E-02 | 8.7E-02 | 9.1E-02 | 8.1E-02 | 7.3E-01        | 7.3E-03 |         |
| Gly-Asp                | 2.1E-04              | 2.0E-04 | 2.5E-04 | 1.8E-04 | 2.8E-04 | 2.1E-04 | 2.0E-04 | 1.9E-04 | 2.3E-04 | 2.7E-04 | 2.3E-04 | 2.4E-04 | 7.1E-01        | 9.7E-03 |         |
