# Supplementary material for: Chronic Intake of Japanese Sake Mediates Radiation-Induced Metabolic Alterations in Mouse Liver
Source: PubMed Central journal article supplement (PMC4713437; doi:10.1371/journal.pone.0146730), 2016-01-11
Supplement: pone.0146730.s009.pdf [file pone.0146730.s009.pdf]

**S6 Table.Selected metabolites.**

These have significant correlation (P<0.01) based on factor loadings between the PC1 scores and variables in the metabolome data for irradiated mice administered sake.

| Sample No              | 1                    | 2       | 3       | 4       | 5       | 6       | 7       | 8       | 9       | 10      | 11      | 12      |                |         |
|------------------------|----------------------|---------|---------|---------|---------|---------|---------|---------|---------|---------|---------|---------|----------------|---------|
| PC1 scores             | -11.30               | -3.14   | -3.82   | 17.52   | 5.40    | 13.07   | -5.82   | -4.89   | -4.96   | -3.51   | 0.39    | 1.05    |                |         |
| Metabolites            | Relative area values |         |         |         |         |         |         |         |         |         |         |         | factor loading | p-value |
| Val                    | 1.3E-01              | 1.1E-01 | 1.1E-01 | 7.8E-02 | 9.6E-02 | 7.8E-02 | 1.1E-01 | 1.1E-01 | 1.2E-01 | 1.1E-01 | 1.1E-01 | 1.1E-01 | -9.7E-01       | 1.1E-07 |
| Urea                   | 5.6E-01              | 5.5E-01 | 5.5E-01 | 3.3E-01 | 4.2E-01 | 3.2E-01 | 5.4E-01 | 5.3E-01 | 5.2E-01 | 4.9E-01 | 5.2E-01 | 4.8E-01 | -9.5E-01       | 2.7E-06 |
| XA0027                 | 4.2E-04              | 2.4E-04 | N.D.    | N.D.    | 2.0E-04 | N.D.    | N.D.    | N.D.    | N.D.    | N.D.    | N.D.    | N.D.    | -9.4E-01       | 7.8E-06 |
| Homoserine             | 4.1E-04              | 3.1E-04 | 3.5E-04 | 1.5E-04 | 2.6E-04 | 2.4E-04 | 3.6E-04 | 3.3E-04 | 3.3E-04 | 2.9E-04 | 3.0E-04 | 2.6E-04 | -9.4E-01       | 8.1E-06 |
| Pipecolic acid         | 3.6E-03              | 2.5E-03 | 2.9E-03 | 1.4E-03 | 1.9E-03 | 1.4E-03 | 2.7E-03 | 2.3E-03 | 2.9E-03 | 2.9E-03 | 2.4E-03 | 2.0E-03 | -9.3E-01       | 1.6E-05 |
| 5,6,7,8-Tetrahydro     | N.D.                 | N.D.    | 1.2E-04 | N.D.    | N.D.    | 1.9E-04 | N.D.    | N.D.    | 1.1E-04 | 1.4E-04 | 1.4E-04 | 1.2E-04 | 9.2E-01        | 2.0E-05 |
| Stachydrine            | 3.0E-02              | 2.8E-02 | 3.0E-02 | 1.1E-02 | 2.1E-02 | 1.2E-02 | 3.1E-02 | 2.9E-02 | 2.8E-02 | 2.8E-02 | 3.3E-02 | 2.6E-02 | -9.2E-01       | 3.0E-05 |
| N6-Acetyllysine        | 4.9E-04              | 5.2E-04 | 4.8E-04 | 2.0E-04 | 3.2E-04 | 2.7E-04 | 4.7E-04 | 4.0E-04 | 4.2E-04 | 4.1E-04 | 3.5E-04 | 3.7E-04 | -9.1E-01       | 3.2E-05 |
| 5-Aminovaleric acid    | 1.2E-02              | 1.1E-02 | 1.4E-02 | 3.8E-03 | 7.6E-03 | 4.6E-03 | 1.2E-02 | 1.1E-02 | 1.3E-02 | 8.3E-03 | 8.9E-03 | 8.6E-03 | -9.0E-01       | 5.9E-05 |
| N-Acetyllysine         | 2.0E-03              | 1.9E-03 | 2.3E-03 | 1.0E-03 | 1.8E-03 | 1.4E-03 | 2.1E-03 | 2.1E-03 | 2.1E-03 | 2.0E-03 | 1.8E-03 | 1.9E-03 | -9.0E-01       | 8.4E-05 |
| Octanoic acid          | N.D.                 | N.D.    | N.D.    | N.D.    | N.D.    | 1.3E-04 | 3.8E-04 | 5.4E-04 | 4.2E-04 | N.D.    | N.D.    | N.D.    | -8.9E-01       | 8.8E-05 |
| Betaine                | 7.1E-01              | 6.6E-01 | 8.2E-01 | 2.7E-01 | 4.8E-01 | 2.9E-01 | 8.0E-01 | 6.4E-01 | 6.0E-01 | 5.8E-01 | 6.8E-01 | 6.1E-01 | -8.9E-01       | 1.1E-04 |
| 2-Aminobutyric acid    | 1.0E-02              | 5.5E-03 | 6.1E-03 | 2.9E-03 | 4.6E-03 | 4.0E-03 | 6.6E-03 | 6.1E-03 | 7.6E-03 | 6.9E-03 | 6.0E-03 | 5.2E-03 | -8.9E-01       | 1.1E-04 |
| XA0012                 | 1.2E-03              | 1.0E-03 | 1.0E-03 | 5.5E-04 | 7.8E-04 | 6.1E-04 | 1.0E-03 | 1.1E-03 | 1.0E-03 | 9.0E-04 | 6.5E-04 | 7.2E-04 | -8.9E-01       | 1.3E-04 |
| Galacturonic acid      | 5.1E-04              | 3.8E-04 | 4.1E-04 | 2.1E-04 | 3.5E-04 | 3.1E-04 | 5.2E-04 | 5.1E-04 | 4.6E-04 | 4.5E-04 | 4.3E-04 | 4.9E-04 | -8.8E-01       | 1.3E-04 |
| Lys                    | 1.6E-01              | 1.4E-01 | 1.6E-01 | 8.6E-02 | 9.6E-02 | 8.2E-02 | 1.2E-01 | 1.2E-01 | 1.3E-01 | 1.4E-01 | 1.2E-01 | 1.2E-01 | -8.8E-01       | 1.4E-04 |
| Hydroxyproline         | 1.5E-02              | 8.8E-03 | 9.4E-03 | 4.8E-03 | 8.1E-03 | 6.0E-03 | 1.1E-02 | 8.4E-03 | 1.2E-02 | 1.2E-02 | 9.8E-03 | 9.8E-03 | -8.8E-01       | 1.4E-04 |
| GABA                   | 4.2E-03              | 3.2E-03 | 4.0E-03 | 2.0E-03 | 3.1E-03 | 2.5E-03 | 3.7E-03 | 3.8E-03 | 3.7E-03 | 4.5E-03 | 3.9E-03 | 3.8E-03 | -8.7E-01       | 2.0E-04 |
| Betonicine             | 5.5E-04              | 4.7E-04 | 6.7E-04 | 1.3E-04 | 2.8E-04 | 1.6E-04 | 5.7E-04 | 6.1E-04 | 5.1E-04 | 3.8E-04 | 5.6E-04 | 4.2E-04 | -8.7E-01       | 2.1E-04 |
| N-Acetylglutamic acid  | 7.7E-03              | 5.7E-03 | 5.8E-03 | 2.2E-03 | 3.5E-03 | 3.0E-03 | 4.4E-03 | 4.7E-03 | 5.0E-03 | 4.6E-03 | 4.0E-03 | 4.1E-03 | -8.7E-01       | 2.5E-04 |
| S-Adenosylhomocysteine | 4.9E-03              | 3.9E-03 | 3.0E-03 | 2.5E-03 | 2.7E-03 | 2.2E-03 | 4.2E-03 | 4.6E-03 | 4.3E-03 | 4.5E-03 | 3.2E-03 | 3.4E-03 | -8.6E-01       | 3.0E-04 |
| 3-Methylhistidine      | 2.8E-03              | 2.0E-03 | 2.5E-03 | 1.2E-03 | 1.5E-03 | 1.2E-03 | 2.4E-03 | 2.0E-03 | 2.9E-03 | 1.8E-03 | 1.9E-03 | 1.6E-03 | -8.6E-01       | 3.1E-04 |
| XC0061                 | 6.5E-03              | 6.3E-03 | 7.2E-03 | 2.5E-03 | 5.3E-03 | 4.9E-03 | 6.6E-03 | 7.2E-03 | 7.4E-03 | 7.8E-03 | 6.4E-03 | 5.1E-03 | -8.6E-01       | 3.5E-04 |
| Methionine sulfoxide   | 1.8E-03              | 1.1E-03 | 1.5E-03 | 6.8E-04 | 8.8E-04 | 7.6E-04 | 1.7E-03 | 1.8E-03 | 1.4E-03 | 1.3E-03 | 1.6E-03 | 1.1E-03 | -8.6E-01       | 3.8E-04 |
| γ-Butyrobetaine        | 6.2E-03              | 6.8E-03 | 8.0E-03 | 2.7E-03 | 4.5E-03 | 3.3E-03 | 6.3E-03 | 5.6E-03 | 5.8E-03 | 5.8E-03 | 5.1E-03 | 4.9E-03 | -8.5E-01       | 4.0E-04 |
| Sarcosine              | 3.4E-02              | 2.5E-02 | 2.2E-02 | 9.5E-03 | 2.1E-02 | 1.7E-02 | 3.1E-02 | 2.5E-02 | 3.1E-02 | 3.7E-02 | 2.6E-02 | 2.9E-02 | -8.5E-01       | 4.5E-04 |
| 3-Hydroxybutyric acid  | 1.8E-02              | 1.5E-02 | 1.4E-02 | 8.3E-03 | 8.8E-03 | 8.4E-03 | 1.6E-02 | 1.7E-02 | 1.5E-02 | 1.1E-02 | 9.9E-03 | 1.0E-02 | -8.5E-01       | 5.0E-04 |
| 2-Methylserine         | 3.1E-04              | 2.3E-04 | 2.7E-04 | N.D.    | 1.9E-04 | 1.2E-04 | 2.8E-04 | 3.4E-04 | 3.3E-04 | 2.3E-04 | 2.2E-04 | 1.7E-04 | -8.5E-01       | 5.1E-04 |
| UDP-glucoseUDP         | 7.8E-03              | 1.1E-02 | 1.4E-02 | 2.4E-02 | 2.9E-02 | 3.6E-02 | 9.5E-03 | 8.9E-03 | 1.2E-02 | 1.9E-02 | 1.6E-02 | 1.8E-02 | 8.4E-01        | 5.7E-04 |
| Phosphoenolpyruvate    | 4.6E-04              | 5.4E-04 | 6.8E-04 | 8.5E-04 | 8.7E-04 | 9.0E-04 | 3.8E-04 | 4.5E-04 | 4.0E-04 | 5.7E-04 | 5.2E-04 | 7.5E-04 | 8.4E-01        | 6.6E-04 |
| Phosphorylcholine      | 2.1E-01              | 1.9E-01 | 1.9E-01 | 5.5E-02 | 1.4E-01 | 1.1E-01 | 1.4E-01 | 1.4E-01 | 1.7E-01 | 1.9E-01 | 1.4E-01 | 1.4E-01 | -8.4E-01       | 6.8E-04 |
| 3-Phosphoglycerate     | 1.0E-03              | 1.2E-03 | 1.4E-03 | 1.8E-03 | 1.7E-03 | 2.1E-03 | 6.9E-04 | 9.2E-04 | 8.7E-04 | 1.2E-03 | 1.2E-03 | 1.6E-03 | -8.4E-01       | 6.9E-04 |
| XC0040                 | 6.1E-04              | 7.4E-04 | 8.0E-04 | 1.6E-04 | 4.2E-04 | 2.2E-04 | 7.4E-04 | 7.3E-04 | 5.6E-04 | 4.8E-04 | 5.4E-04 | 6.8E-04 | -8.4E-01       | 6.9E-04 |
| cis-4-Hydroxyproline   | 3.7E-04              | 2.4E-04 | 2.6E-04 | 1.9E-04 | 1.7E-04 | 1.7E-04 | 2.6E-04 | 2.5E-04 | 2.8E-04 | 2.9E-04 | 2.8E-04 | 2.3E-04 | -8.3E-01       | 7.9E-04 |
| XA0033                 | 3.7E-02              | 3.4E-02 | 3.5E-02 | 1.1E-02 | 2.6E-02 | 2.2E-02 | 2.5E-02 | 2.7E-02 | 3.1E-02 | 3.6E-02 | 2.6E-02 | 2.7E-02 | -8.3E-01       | 8.1E-04 |
| SDMA                   | 1.8E-04              | 1.5E-04 | 1.4E-04 | 1.0E-04 | 1.4E-04 | 9.6E-05 | 1.2E-04 | 1.5E-04 | 1.5E-04 | 1.3E-04 | 1.2E-04 | 1.4E-04 | -8.2E-01       | 1.1E-03 |
| Trigonelline           | 5.6E-03              | 5.0E-03 | 4.6E-03 | 1.8E-03 | 4.0E-03 | 2.5E-03 | 4.8E-03 | 4.2E-03 | 5.1E-03 | 6.3E-03 | 5.2E-03 | 5.8E-03 | -8.2E-01       | 1.1E-03 |
| Glucuronic acid        | 4.9E-03              | 5.4E-03 | 5.6E-03 | 2.7E-03 | 4.5E-03 | 3.5E-03 | 6.1E-03 | 6.0E-03 | 5.6E-03 | 5.7E-03 | 5.8E-03 | 6.1E-03 | -8.2E-01       | 1.2E-03 |
| N6-Methyllysine        | 5.9E-04              | 3.9E-04 | 3.9E-04 | 1.9E-04 | 1.7E-04 | 1.3E-04 | 5.1E-04 | 4.7E-04 | 4.9E-04 | 2.0E-04 | 2.9E-04 | 2.3E-04 | -8.1E-01       | 1.4E-03 |
| UDP-glucuronic acid    | 4.8E-03              | 4.4E-03 | 5.9E-03 | 3.5E-04 | 2.0E-03 | 6.6E-04 | 4.3E-03 | 3.7E-03 | 2.7E-03 | 1.8E-03 | 3.2E-03 | 3.5E-03 | -8.1E-01       | 1.5E-03 |
| Ophthalmic acid        | 1.8E-03              | 1.3E-03 | 1.4E-03 | 8.3E-04 | 1.4E-03 | 1.2E-03 | 1.8E-03 | 1.3E-03 | 1.4E-03 | 1.4E-03 | 1.4E-03 | 1.3E-03 | -8.1E-01       | 1.5E-03 |

|                     |         |         |         |         |         |         |         |         |         |         |         |         |          |         |
|---------------------|---------|---------|---------|---------|---------|---------|---------|---------|---------|---------|---------|---------|----------|---------|
| Gln                 | 2.5E-01 | 2.3E-01 | 2.2E-01 | 3.5E-01 | 2.6E-01 | 2.8E-01 | 2.1E-01 | 2.4E-01 | 2.1E-01 | 2.7E-01 | 2.6E-01 | 2.6E-01 | 8.1E-01  | 1.6E-03 |
| Ile                 | 8.0E-02 | 7.0E-02 | 6.2E-02 | 5.9E-02 | 6.8E-02 | 5.6E-02 | 7.2E-02 | 7.2E-02 | 7.6E-02 | 7.5E-02 | 6.2E-02 | 6.7E-02 | -8.0E-01 | 1.6E-03 |
| 1-Methylnicotinar   | 7.7E-04 | 5.2E-04 | 5.5E-04 | 3.7E-04 | 2.4E-04 | 2.9E-04 | 5.5E-04 | 6.4E-04 | 5.1E-04 | 5.9E-04 | 3.9E-04 | 3.8E-04 | -8.0E-01 | 1.7E-03 |
| γ-Glu-Cys           | 8.4E-04 | 4.6E-04 | 6.9E-04 | 4.5E-04 | 4.1E-04 | 4.3E-04 | 6.5E-04 | 6.9E-04 | 6.8E-04 | 7.7E-04 | 6.1E-04 | 5.7E-04 | -8.0E-01 | 1.9E-03 |
| N-Acetylhistidine   | 9.5E-04 | 7.6E-04 | 9.0E-04 | 5.5E-04 | 6.5E-04 | 6.6E-04 | 8.4E-04 | 7.5E-04 | 6.8E-04 | 7.8E-04 | 6.2E-04 | 7.0E-04 | -8.0E-01 | 2.0E-03 |
| Met                 | 1.4E-02 | 1.1E-02 | 1.1E-02 | 9.7E-03 | 8.2E-03 | 7.3E-03 | 1.2E-02 | 1.2E-02 | 1.1E-02 | 1.3E-02 | 1.1E-02 | 9.3E-03 | -7.9E-01 | 2.4E-03 |
| N-Acetylserine      | 3.7E-04 | 3.3E-04 | 2.8E-04 | 2.1E-04 | 2.8E-04 | 2.2E-04 | 2.7E-04 | 3.0E-04 | 2.5E-04 | 3.1E-04 | 2.5E-04 | 2.7E-04 | -7.9E-01 | 2.4E-03 |
| Ornithine           | 9.2E-02 | 8.9E-02 | 9.2E-02 | 4.3E-02 | 7.9E-02 | 5.4E-02 | 7.4E-02 | 7.5E-02 | 6.7E-02 | 8.9E-02 | 8.5E-02 | 8.6E-02 | -7.8E-01 | 3.0E-03 |
| Isovalerylalanine   | 4.2E-04 | 3.3E-04 | 2.3E-04 | 1.9E-04 | 2.7E-04 | 2.1E-04 | 3.3E-04 | 3.0E-04 | 3.8E-04 | 4.1E-04 | 2.4E-04 | 3.0E-04 | -7.7E-01 | 3.5E-03 |
| Leu                 | 1.4E-01 | 1.2E-01 | 1.1E-01 | 1.1E-01 | 1.2E-01 | 1.0E-01 | 1.2E-01 | 1.2E-01 | 1.3E-01 | 1.4E-01 | 1.2E-01 | 1.3E-01 | -7.6E-01 | 4.0E-03 |
| Gluconolactone      | 6.6E-03 | 5.9E-03 | 6.7E-03 | 3.7E-03 | 5.5E-03 | 5.3E-03 | 6.5E-03 | 6.5E-03 | 7.4E-03 | 8.1E-03 | 7.2E-03 | 6.7E-03 | -7.6E-01 | 4.1E-03 |
| Imidazolelactic ac  | 3.2E-04 | 3.5E-04 | 3.4E-04 | 9.8E-05 | 2.6E-04 | 1.8E-04 | 2.7E-04 | 2.0E-04 | 3.5E-04 | 3.0E-04 | 2.6E-04 | 3.4E-04 | -7.6E-01 | 4.4E-03 |
| 2-Hydroxybutyric    | 2.9E-03 | 2.0E-03 | 2.4E-03 | 9.9E-04 | 1.9E-03 | 2.0E-03 | 2.6E-03 | 2.8E-03 | 3.7E-03 | 3.3E-03 | 2.9E-03 | 2.6E-03 | -7.5E-01 | 4.5E-03 |
| 3-Aminoisobutyric   | 2.6E-03 | 1.9E-03 | 1.6E-03 | 1.2E-03 | 1.6E-03 | 1.0E-03 | 1.5E-03 | 1.7E-03 | 1.4E-03 | 1.7E-03 | 1.6E-03 | 1.7E-03 | -7.5E-01 | 4.8E-03 |
| XA0035              | 4.3E-04 | 4.3E-04 | 4.4E-04 | 5.7E-04 | 6.3E-04 | 7.5E-04 | 3.1E-04 | 4.1E-04 | 4.3E-04 | 5.4E-04 | 5.1E-04 | 4.2E-04 | 7.5E-01  | 4.8E-03 |
| XA0055              | 2.5E-04 | 2.4E-04 | 4.7E-04 | 2.0E-03 | 6.2E-04 | 3.9E-04 | N.D.    | 3.0E-04 | 2.4E-04 | 1.6E-04 | 8.5E-04 | 6.0E-04 | 7.4E-01  | 6.3E-03 |
| 5'-Deoxy-5'-meth    | 2.7E-04 | 1.9E-04 | 1.7E-04 | 1.2E-04 | 1.5E-04 | 1.3E-04 | 1.9E-04 | 1.6E-04 | 1.6E-04 | 1.4E-04 | 1.6E-04 | 1.4E-04 | -7.3E-01 | 6.9E-03 |
| N5-Ethylglutamine   | 3.8E-04 | 3.7E-04 | 5.3E-04 | 2.4E-04 | 3.3E-04 | 3.0E-04 | 5.8E-04 | 5.5E-04 | 5.2E-04 | 4.5E-04 | 4.8E-04 | 4.1E-04 | -7.3E-01 | 7.0E-03 |
| Ribulose 5-phosph   | 6.0E-03 | 5.8E-03 | 6.2E-03 | 9.4E-03 | 6.8E-03 | 8.2E-03 | 5.9E-03 | 6.5E-03 | 6.2E-03 | 8.8E-03 | 7.6E-03 | 7.8E-03 | 7.3E-01  | 7.0E-03 |
| N-Acetylglutamine   | 6.1E-04 | 5.4E-04 | 6.5E-04 | 8.0E-04 | 6.7E-04 | 7.7E-04 | 5.8E-04 | 6.4E-04 | 4.9E-04 | 7.2E-04 | 5.8E-04 | 6.2E-04 | 7.3E-01  | 7.2E-03 |
| N-Methylalanine     | 2.3E-04 | 1.6E-04 | 1.4E-04 | N.D.    | N.D.    | N.D.    | N.D.    | 1.1E-04 | N.D.    | 1.4E-04 | 1.4E-04 | N.D.    | -7.3E-01 | 7.3E-03 |
| Homocitrulline      | 2.3E-04 | 2.0E-04 | 1.8E-04 | 1.5E-04 | 1.8E-04 | 1.3E-04 | 2.4E-04 | 2.3E-04 | 2.1E-04 | 1.5E-04 | 1.8E-04 | 1.3E-04 | -7.2E-01 | 8.5E-03 |
| Isovalerylcarnitine | 2.6E-03 | 2.1E-03 | 2.2E-03 | 4.1E-04 | 2.9E-03 | 1.8E-03 | 3.7E-03 | 3.3E-03 | 4.4E-03 | 3.2E-03 | 2.5E-03 | 2.7E-03 | -7.2E-01 | 8.6E-03 |
| Cystathionine       | 1.2E-02 | 7.1E-03 | 5.8E-03 | 3.7E-03 | 6.9E-03 | 6.1E-03 | 6.6E-03 | 7.5E-03 | 8.5E-03 | 1.0E-02 | 6.4E-03 | 7.6E-03 | -7.2E-01 | 8.7E-03 |
| Glutaric acid       | 7.7E-04 | 5.1E-04 | 3.8E-04 | 1.8E-04 | 4.4E-04 | 4.8E-04 | 7.2E-04 | 6.0E-04 | 4.4E-04 | 7.6E-04 | 4.8E-04 | 5.6E-04 | -7.2E-01 | 8.7E-03 |
| Cytosine            | N.D.    | N.D.    | N.D.    | N.D.    | N.D.    | N.D.    | 4.3E-05 | 5.7E-05 | 8.7E-05 | N.D.    | N.D.    | N.D.    | 7.1E-01  | 9.8E-03 |
